# Supplementary material for: Aluminyl derived ethene functionalization with heteroallenes, leading to an intramolecular ligand rearrangement
Source: Royal Society of Chemistry journal article supplement (doi:10.1039/d3cc05785b), 2023-12-22
Supplement: d3cc05785b1.pdf [file d3cc05785b1.pdf]

## Aluminyl Derived Ethene Functionalization with Heteroallenes, Leading to an Intramolecular Ligand Rearrangement

Andrea O'Reilly, Michael G. Gardiner, Claire L. McMullin, J. Robin Fulton and Martyn P. Coles

### Table of Contents:

|     |                                                                                                                                                             |
|-----|-------------------------------------------------------------------------------------------------------------------------------------------------------------|
| S2  | General Experimental Procedures                                                                                                                             |
| S2  | Experimental Details for $K[Al(NON)(\eta-C_2H_4)]$ ( <b>1</b> )                                                                                             |
| S3  | <b>Figure S1</b> $^1H$ NMR spectrum of $K[Al(NON)(\eta-C_2H_4)]$ ( <b>1</b> )                                                                               |
| S4  | <b>Figure S2</b> IR spectrum of $K[Al(NON)(\eta-C_2H_4)]$ ( <b>1</b> )                                                                                      |
| S5  | Experimental Details for $K[Al(NON)\{CH_2CH_2C(=O)O\}]$ ( <b>1</b> )                                                                                        |
| S6  | <b>Figure S3</b> $^1H$ NMR spectrum of $K[Al(NON)\{CH_2CH_2C(=O)O\}]$ ( <b>1</b> )                                                                          |
| S7  | <b>Figure S4</b> $^{13}C\{^1H\}$ NMR spectrum of $K[Al(NON)\{CH_2CH_2C(=O)O\}]$ ( <b>1</b> )                                                                |
| S8  | <b>Figure S5</b> IR spectrum of $K[Al(NON)\{CH_2CH_2C(=O)O\}]$ ( <b>1</b> )                                                                                 |
| S9  | <b>Figure S6</b> ORTEP of $\{[K(Et_2O)_2]\{Al(NON)\{CH_2CH_2C(=O)O\}\}_2 [1 \cdot (Et_2O)_2]_2$                                                             |
| S10 | Experimental Details for $K[Al(NON)\{CH_2CH_2C(=NiPr)NiPr\}]$ ( <b>2</b> )                                                                                  |
| S11 | <b>Figure S7</b> $^1H$ NMR spectrum of $K[Al(NON)\{CH_2CH_2C(=NiPr)NiPr\}]$ ( <b>2</b> )                                                                    |
| S12 | <b>Figure S8</b> $^{13}C\{^1H\}$ NMR spectrum of $K[Al(NON)\{CH_2CH_2C(=NiPr)NiPr\}]$ ( <b>2</b> )                                                          |
| S13 | <b>Figure S9</b> IR spectrum of $K[Al(NON)\{CH_2CH_2C(=NiPr)NiPr\}]$ ( <b>2</b> )                                                                           |
| S14 | <b>Figure S10</b> ORTEP of $[K(Et_2O)][Al(NON)(CH_2CH_2C\{=NiPr\}NiPr)] \cdot K[Al(NON)(CH_2CH_2C\{=NiPr\}NiPr)] [(2 \cdot Et_2O)(2)]$                      |
| S15 | Experimental Details for $K[Al(NNO)\{CH_2CH_2C(=NiPr)NiPr\}]$ ( <b>3</b> )                                                                                  |
| S16 | <b>Figure S11</b> $^1H$ NMR spectrum of $K[Al(NON)\{CH_2CH_2C(=NiPr)NiPr\}]$ ( <b>2</b> )                                                                   |
| S17 | <b>Figure S12</b> $^{13}C\{^1H\}$ NMR spectrum of $K[Al(NON)\{CH_2CH_2C(=NiPr)NiPr\}]$ ( <b>2</b> )                                                         |
| S18 | <b>Figure S13</b> Stacked $^1H$ NMR spectra of conversion of <b>2</b> to <b>3</b>                                                                           |
| S19 | <b>Figure S14</b> IR spectrum of $K[Al(NON)\{CH_2CH_2C(=NiPr)NiPr\}]$ ( <b>2</b> )                                                                          |
| S20 | <b>Figure S15</b> ORTEP of $[K(C_6H_6)][Al(NNO)\{CH_2CH_2C(=NiPr)NiPr\}]$ ( <b>3</b> · <b>C<sub>6</sub>H<sub>6</sub></b> )                                  |
| S21 | <b>Figure S16</b> ORTEP of $\{[K(C_6H_6)]\{Al(NNO)\{CH_2CH_2C(=NiPr)NiPr\}\}_2 [3 \cdot (C_6H_6)]_2$                                                        |
| S22 | <b>Figure S17</b> Summary of % $V_{Bur}$ data for 'Al(NON)'                                                                                                 |
| S23 | <b>Figure S18</b> Summary of % $V_{Bur}$ data for 'Al(NNO)'                                                                                                 |
| S24 | <b>Crystallographic Details</b>                                                                                                                             |
| S25 | <b>Table S1</b> Crystal structure and refinement data for $[1 \cdot (Et_2O)_2]_2$ , $[(2 \cdot Et_2O)(2)]$ and <b>3</b> · <b>C<sub>6</sub>H<sub>6</sub></b> |
| S26 | <b>Computational Details</b>                                                                                                                                |
| S25 | <b>Table S2</b> Relative energies for computed structures.                                                                                                  |
| S26 | <b>Figure S19</b> Computed free energy profile for conversion of <b>2</b> <sup>DFT</sup> to <b>3</b> <sup>DFT</sup>                                         |
| S27 | <b>References</b>                                                                                                                                           |
| S30 | <b>Cartesian Coordinates and Electronic Energies for Computed Structures</b>                                                                                |

## General Experimental Procedures

All manipulations were performed under a dry nitrogen atmosphere in a conventional glovebox or under a dry argon atmosphere using standard Schlenk-line techniques. Deuterated solvents were degassed using freeze-pump-thaw method on a Schlenk-line and stored over activated 5 Å sieves for 24 hours prior to use. Hexane, toluene and diethyl ether (Et<sub>2</sub>O) were obtained from a PureSolv MD 5 system and stored over activated 5 Å sieves for 24 hours prior to use. NMR spectra were recorded using a Jeol JNM-ECZ500S 500 MHz spectrometer equipped with a ROYAL digital auto tune probe S, operating at 500.1 (<sup>1</sup>H) and 125.8 (<sup>13</sup>C{<sup>1</sup>H}). Spectra were recorded at 294 K (unless stated otherwise) and proton and carbon chemical shifts were referenced internally to residual solvent resonances. Coupling constants are quoted in Hz. IR spectra were recorded on solid samples using a Bruker Alpha FT-IR Spectrometer.

K[Al(NON)( $\eta$ -C<sub>2</sub>H<sub>4</sub>)] was prepared according to a modified literature procedures.<sup>[S1]</sup> All other chemicals were purchased from Sigma-Aldrich and used without further purification.

### Synthesis of K[Al(NON)( $\eta$ -C<sub>2</sub>H<sub>4</sub>)] (I)

A solution of K[Al(NON)] (300 mg, 0.27 mmol) was sealed in an ampule and degassed on a Schlenk line. The ampule was charged with ethene gas (~1.5 bar) and the reaction mixture was stirred at room temperature for 2 days. The solvent was removed *in vacuo* and the solid was washed with hexane (3 x 10 mL) to afford a white powder that was used without any further purification.

<sup>1</sup>H NMR (500 MHz, C<sub>6</sub>D<sub>6</sub>):  $\delta$  7.04 (d, *J* = 7.6, 4H, C<sub>6</sub>H<sub>3</sub>), 6.92 (t, *J* = 7.6, 2H, C<sub>6</sub>H<sub>3</sub>), 4.23 (sept, *J* = 6.9, 4H, CHMe<sub>2</sub>), 1.39 (d, *J* = 6.9, 12H, CHMe<sub>2</sub>), 1.28 (d, *J* = 6.9, 12H, CHMe<sub>2</sub>), 0.47 (s, 12H, SiMe<sub>2</sub>), -1.40 (s, 4H, C<sub>2</sub>H<sub>4</sub>).

IR (solid, cm<sup>-1</sup>): 2961 (m), 2867 (w), 1463 (w), 1424 (m), 1383 (w), 1361 (w), 1311 (w), 1246 (s), 1188 (m), 1108 (w), 1041 (m), 1014 (s), 963 (w), 942 (s), 933 (s), 841 (s), 824 (s), 792 (vs), 775 (vs), 696 (s), 652 (s), 603 (s), 562 (br s), 449 (m), 433 (m).

**Figure S1**  $^1\text{H}$  NMR spectrum (500 MHz,  $\text{C}_6\text{D}_6$ ) of  $\text{K}[\text{Al}(\text{NON})(\eta\text{-C}_2\text{H}_4)]$  (I)

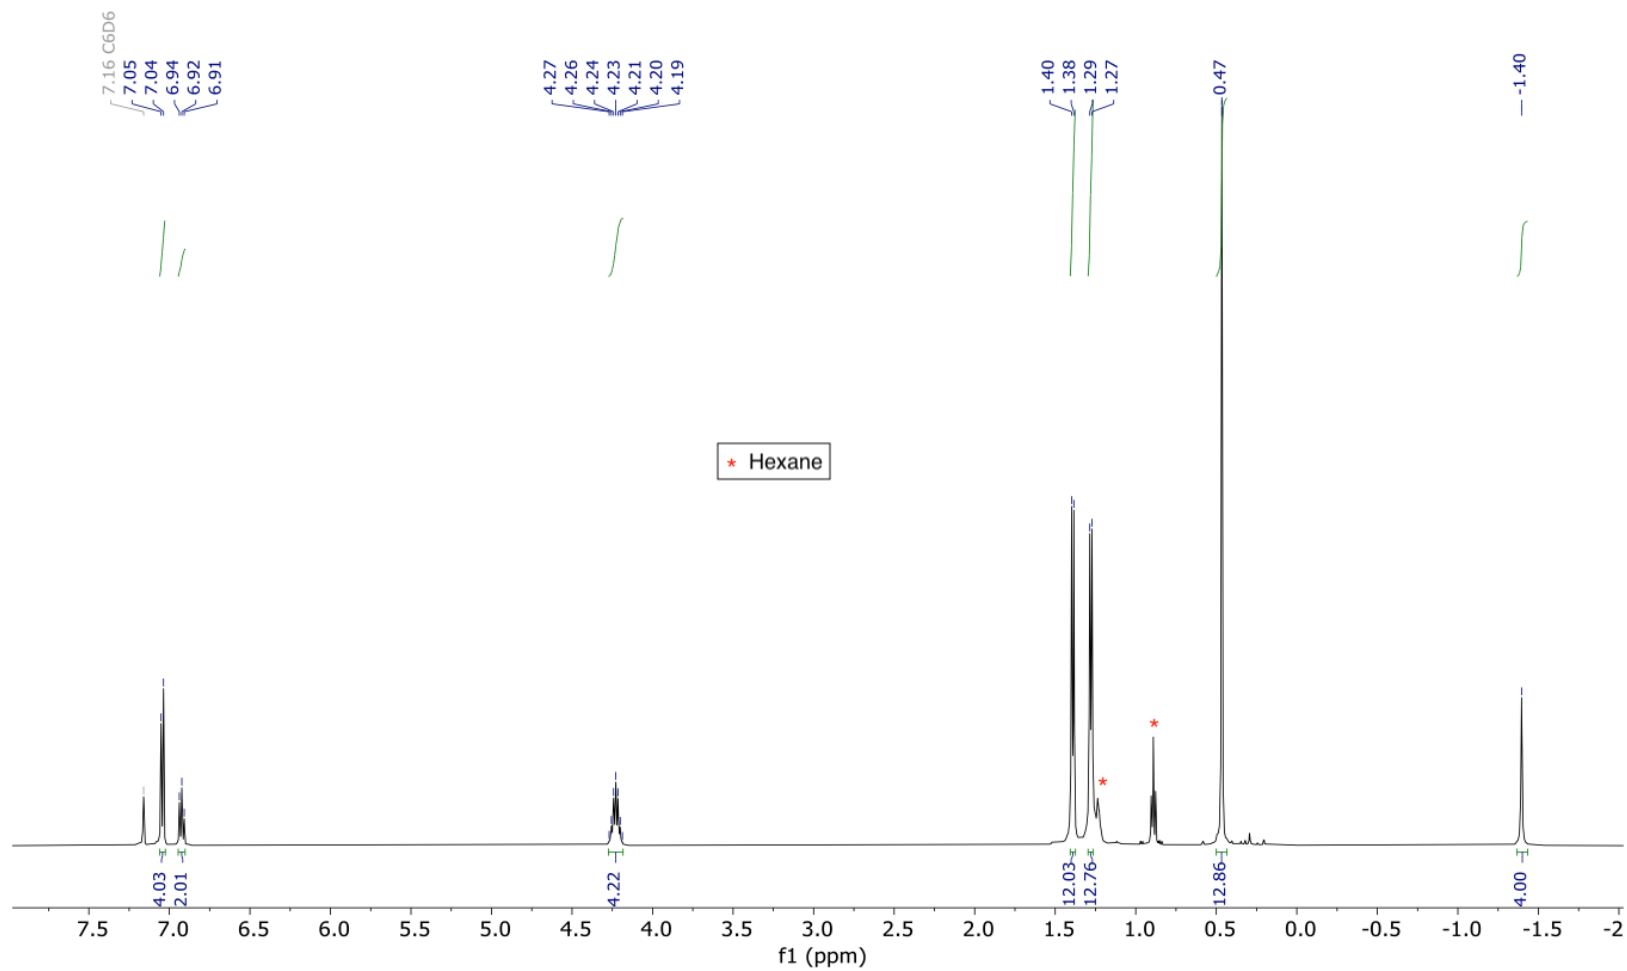

**Figure S2** IR spectrum (solid,  $\text{cm}^{-1}$ ) of  $\text{K}[\text{Al}(\text{NON})(\eta\text{-C}_2\text{H}_4)]$  (I)

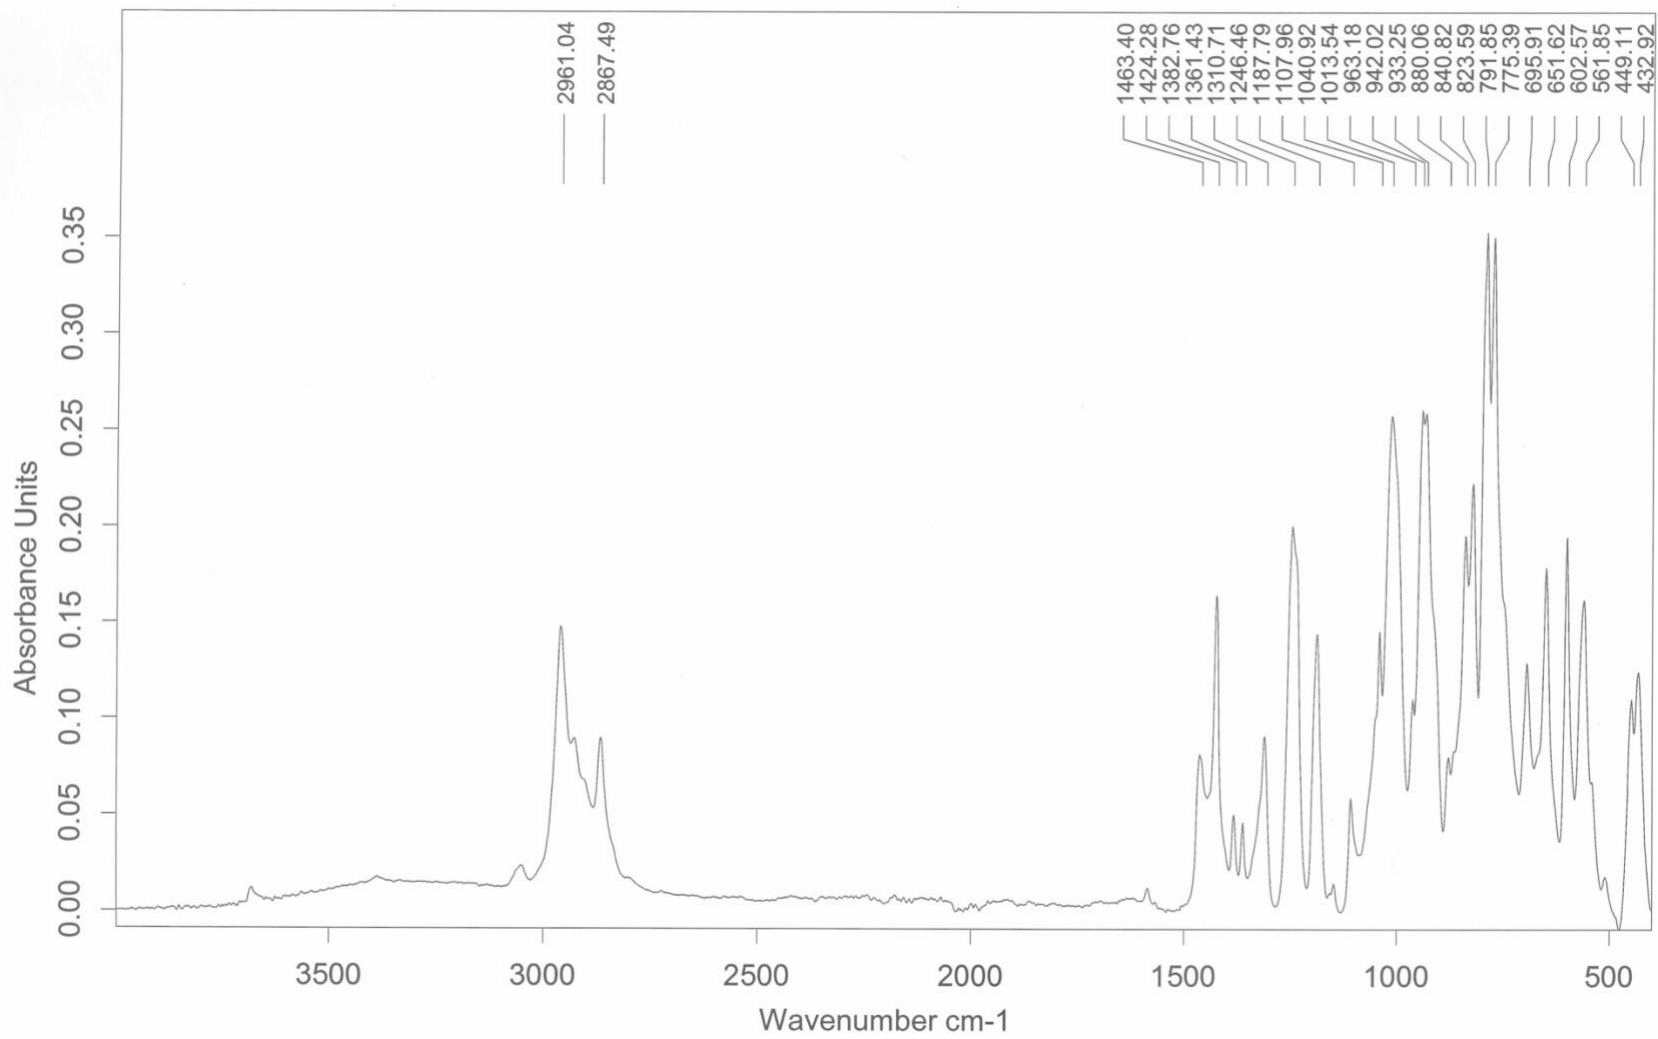

### Synthesis of $\text{K}[\text{Al}(\text{NON})\{\text{CH}_2\text{CH}_2^{13}\text{C}(=\text{O})\text{O}\}]$ (**1**)

A  $\text{C}_6\text{D}_6$  solution of  $\text{K}[\text{Al}(\text{NON})(\text{C}_2\text{H}_4)]$  (**1**, 30.3 mg, 0.05 mmol) in an NMR tube fitted with a J. Young's Teflon tap was degassed, and the tube was charged with  $\sim 1$  bar of isotopically labelled  $^{13}\text{CO}_2$  gas. The reaction was analysed by  $^1\text{H}$  NMR spectroscopy showing complete conversion to  $\text{K}[\text{Al}(\text{NON})\{\text{CH}_2\text{CH}_2^{13}\text{C}(=\text{O})\text{O}\}]$  (**1**) after  $\sim 15$  mins. The solvent was removed *in vacuo* and colourless crystals of  $[\mathbf{1}\cdot(\text{Et}_2\text{O})_2]_2$  suitable for X-ray diffraction were obtained by recrystallisation from  $\text{Et}_2\text{O}$ . Yield 32.7 mg, 81 %.

Accurate elemental analysis could not be obtained for **1**.

$^1\text{H}$  NMR\* (500 MHz,  $\text{C}_6\text{D}_6$ ):  $\delta$  7.05 (d,  $J = 7.5$ , 2H,  $\text{C}_6\text{H}_3$ ), 6.93 (d,  $J = 7.5$ , 2H,  $\text{C}_6\text{H}_3$ ), 6.85 (t,  $J = 7.5$ , 2H,  $\text{C}_6\text{H}_3$ ), 4.16 (m, 4H,  $\text{CHMe}_2$ ), 1.79 (m, 2H,  $\text{AlCH}_2\text{CH}_2$ ), 1.34 (d,  $J = 6.8$ , 6H,  $\text{CHMe}_2$ ), 1.30 (dd $^\ddagger$ ,  $J = 7.1$ , 12H,  $\text{CHMe}_2$ ), 1.14 (d,  $J = 6.8$ , 6H,  $\text{CHMe}_2$ ), 0.53 (s, 6H,  $\text{SiMe}_2$ ), 0.37 (s, 6H,  $\text{SiMe}_2$ ), 0.17 (m, 2H,  $\text{AlCH}_2\text{CH}_2$ ).  $^\ddagger$  overlapping peaks.

$^{13}\text{C}\{^1\text{H}\}$  NMR\* (126 MHz,  $\text{C}_6\text{D}_6$ ):  $\delta$  188.8 ( $\text{O}^{13}\text{C}(=\text{O})$ ), 148.0, 146.7, 124.3, 123.0, 122.4 ( $\text{C}_6\text{H}_3$ ), 34.8 (d,  $^1J_{\text{CC}} = 49$ ,  $\text{CH}_2^{13}\text{C}$ ), 27.7, 27.4 ( $\text{CHMe}_2$ ), 26.0, 25.5, 25.4, 25.1 ( $\text{CHMe}_2$ ), 3.0 ( $\text{SiMe}_2$ ), 2.8 (d,  $^2J_{\text{CC}} = 6$ ,  $\text{AlCH}_2\text{CH}_2^{13}\text{C}$ ), 2.5 ( $\text{SiMe}_2$ ).

\* NMR spectra were recorded under an atmosphere of  $^{13}\text{CO}_2$ .

IR (solid,  $\text{cm}^{-1}$ ): 2963 (m), 2867 (w), 1578 (br m,  $\nu_{\text{CO}}$ ), 1461 (w), 1428 (m), 1381 (w), 1360 (w), 1312 (w), 1249 (s), 1182 (m), 1105 (w), 1042 (m), 998 (s), 932 (s), 882 (m), 857 (s), 823 (s), 794 (vs), 776 (vs), 747 (m), 703 (m), 675 (s), 629 (m), 603 (m), 576 (m), 450 (m).

**Figure S3**  $^1\text{H}$  NMR spectrum (500 MHz,  $\text{C}_6\text{D}_6$ ) of  $\text{K}[\text{Al}(\text{NON})\{\text{CH}_2\text{CH}_2\text{C}(=\text{O})\text{O}\}]$  (**1**) (recorded under atmosphere of  $^{13}\text{CO}_2$ ).

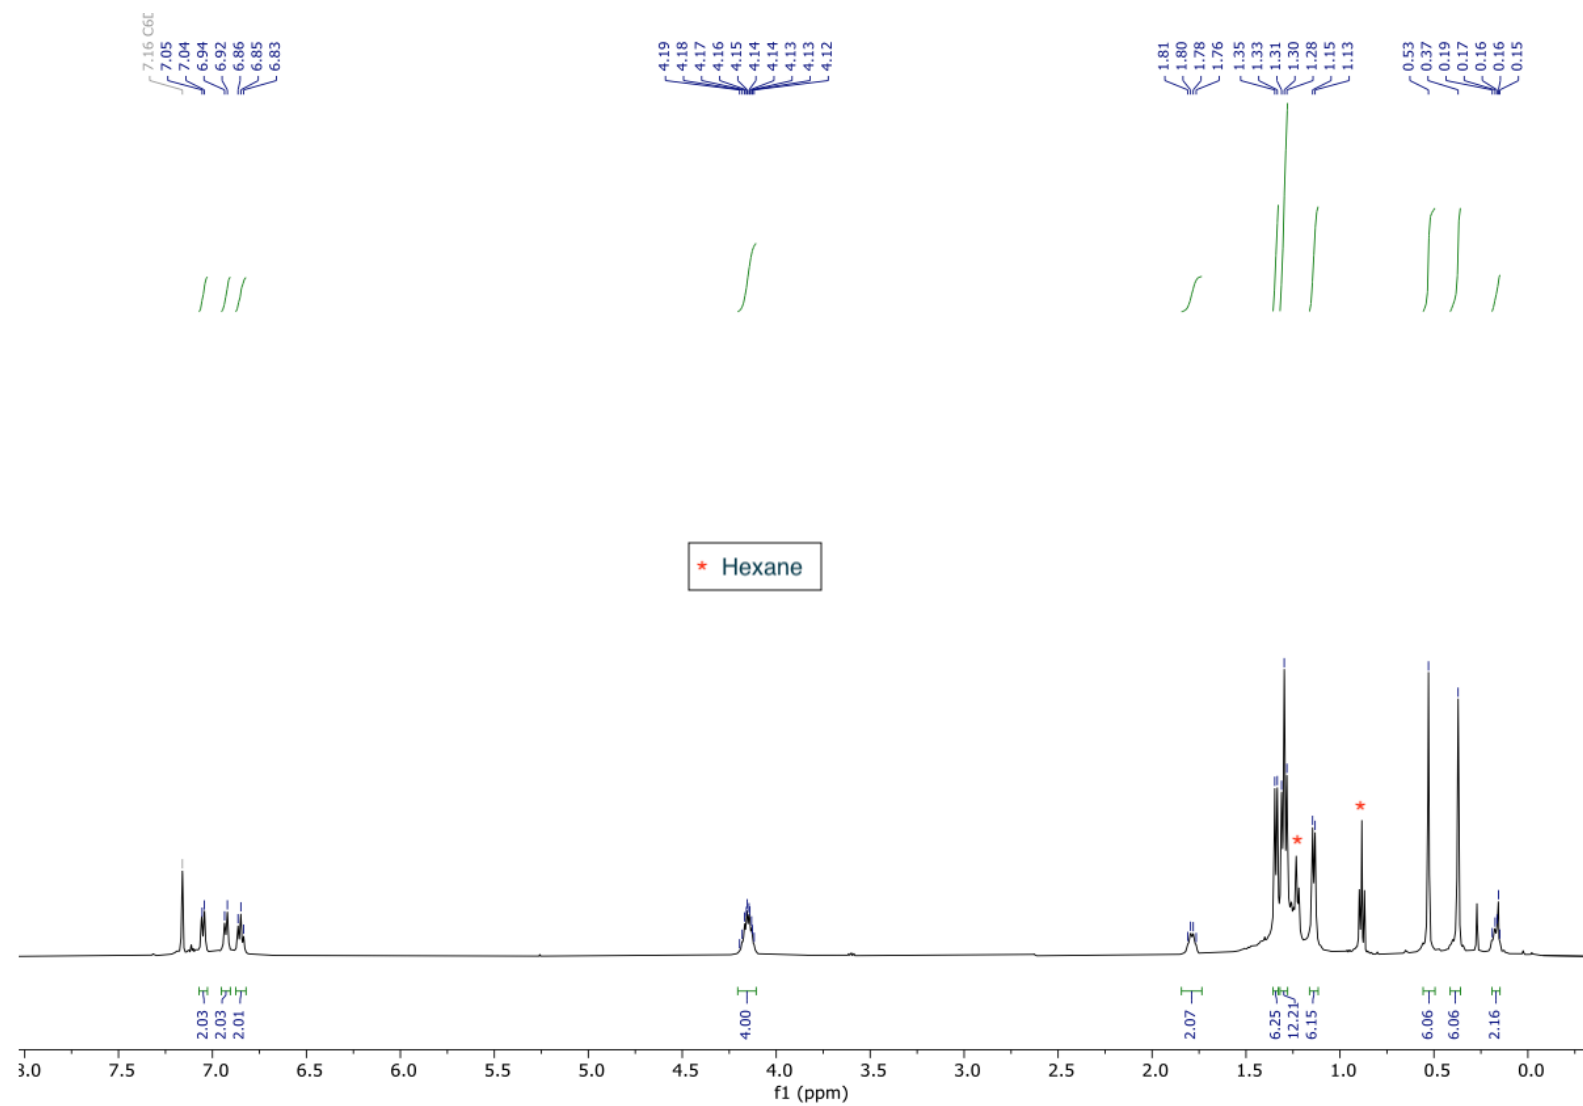

**Figure S4**  $^{13}\text{C}\{^1\text{H}\}$  NMR spectrum (126 MHz,  $\text{C}_6\text{D}_6$ ) of  $\text{K}[\text{Al}(\text{NON})\{\text{CH}_2\text{CH}_2\text{C}(=\text{O})\text{O}\}]$  (**1**) (recorded under atmosphere of  $^{13}\text{CO}_2$ ).

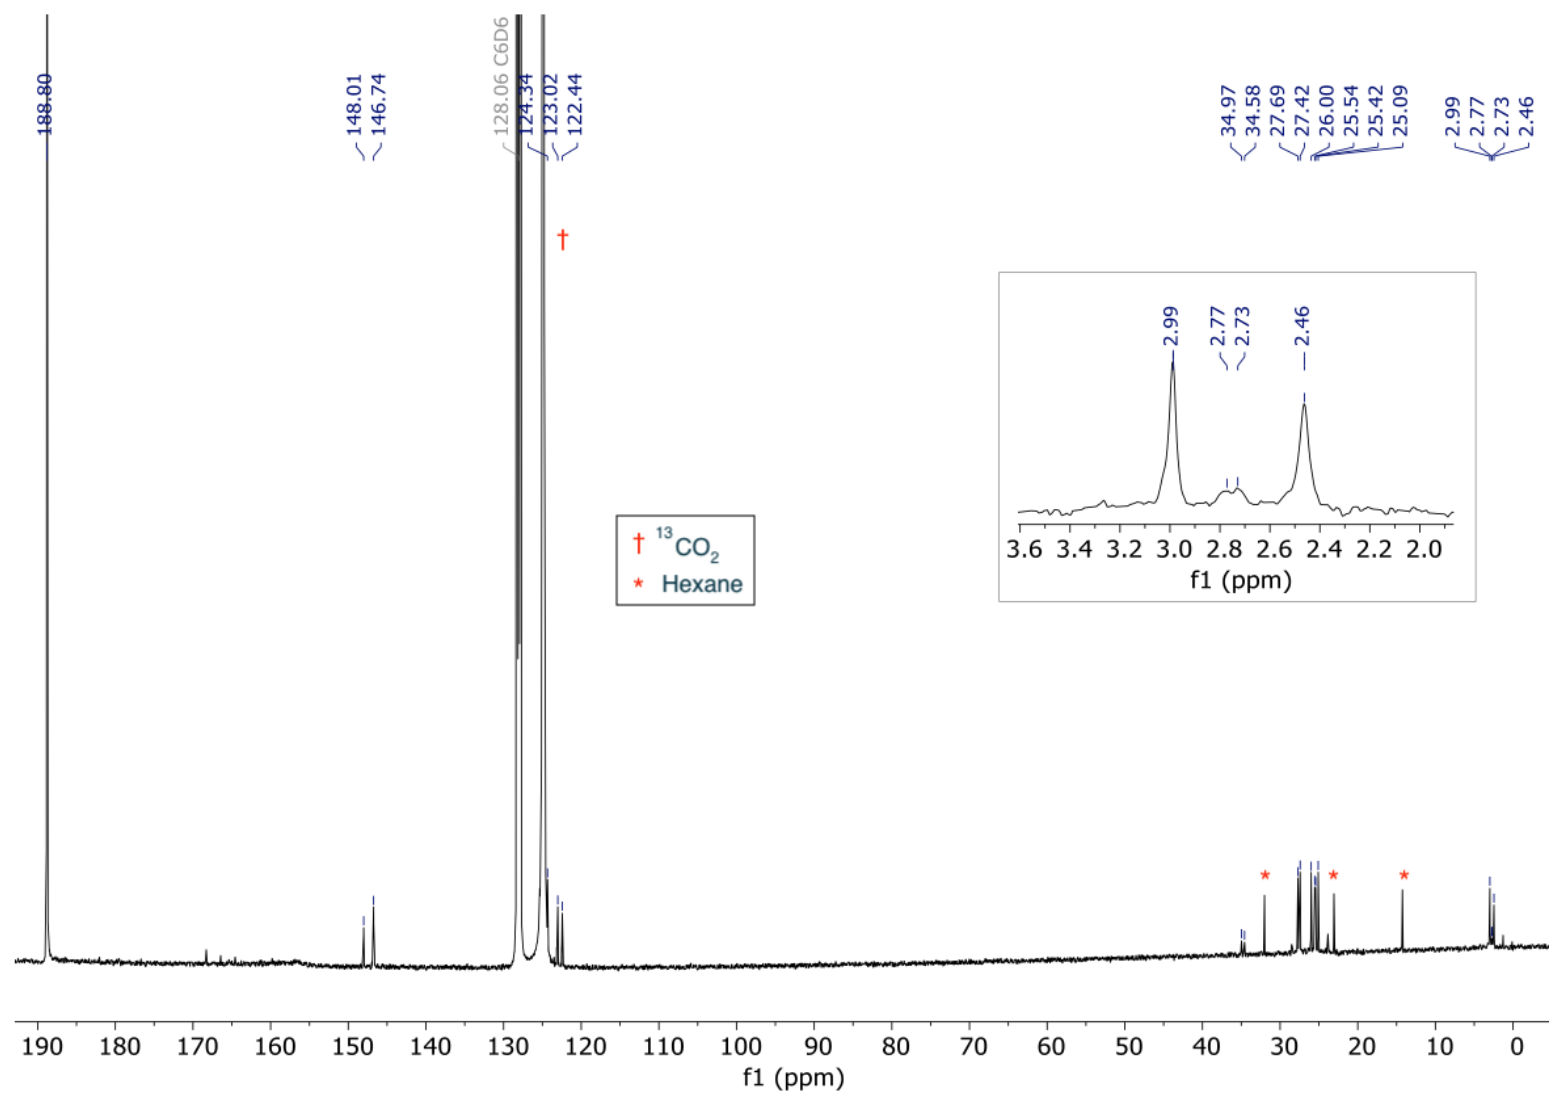

Figure S5 IR spectrum (solid,  $\text{cm}^{-1}$ ) of  $\text{K}[\text{Al}(\text{NON})\{\text{CH}_2\text{CH}_2\text{C}(\text{=O})\text{O}\}]$  (**1**).

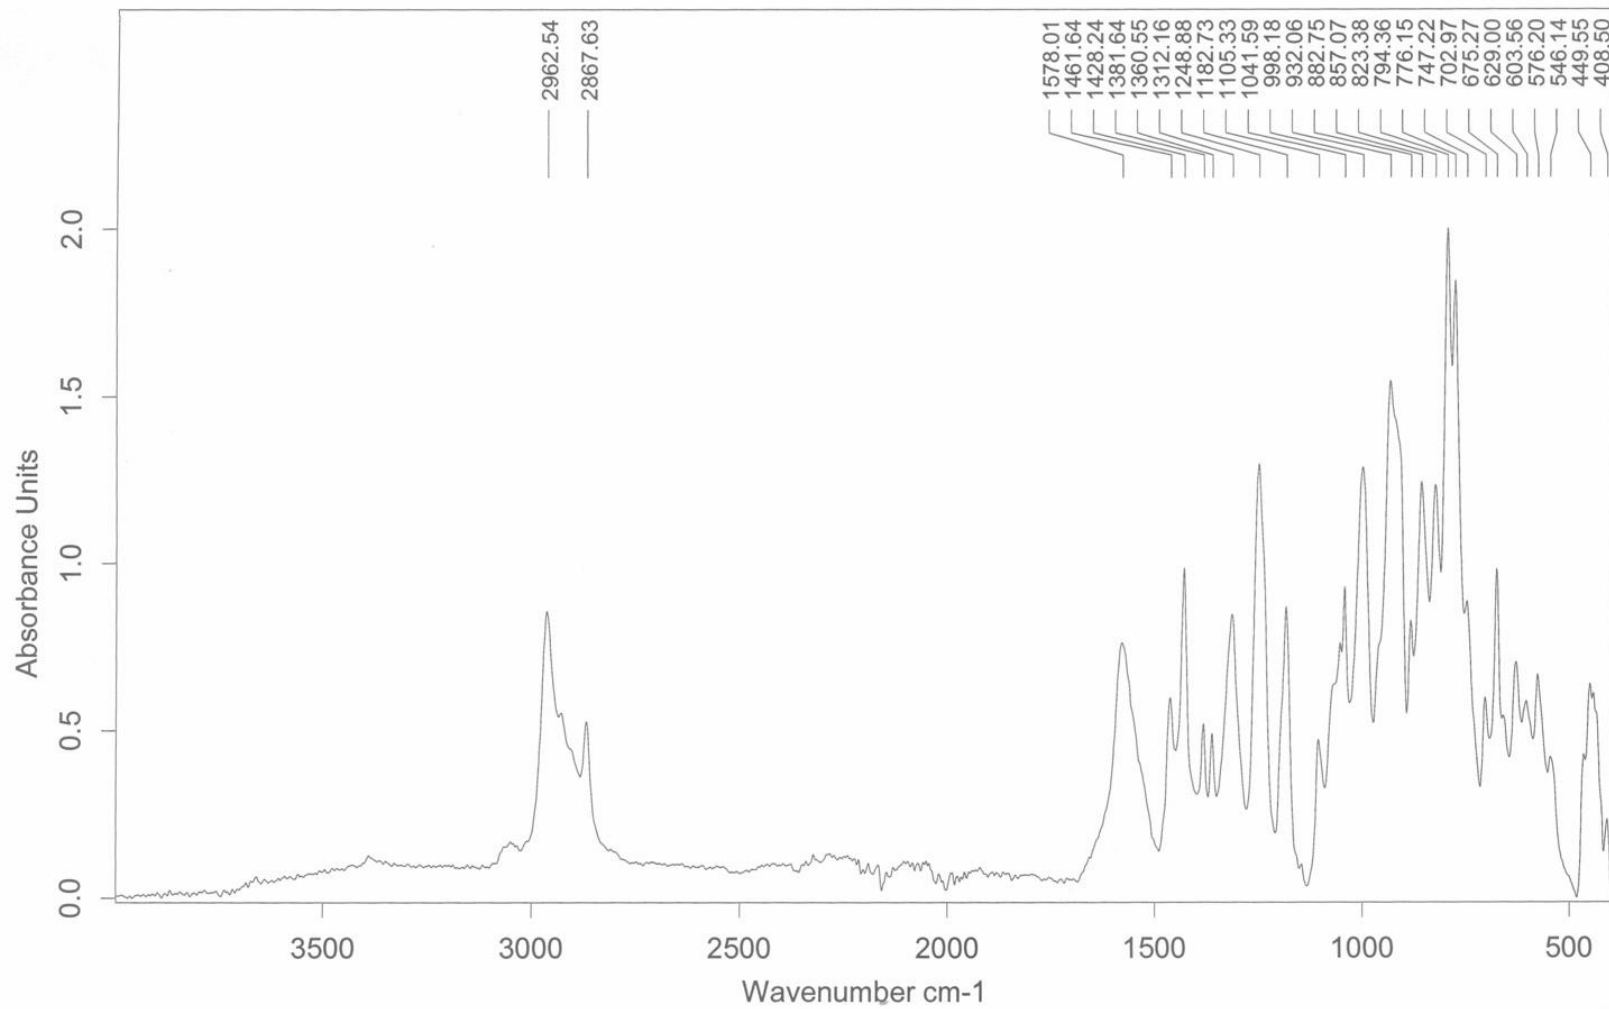



**Figure S6** ORTEP (ellipsoids 30%, H-atoms {except  $CH_2$  of metallacycle} and disordered atoms omitted), of the asymmetric unit of  $[[K(Et_2O)_2]\{Al\{NON\}\{CH_2CH_2C(=O)O\}_2 [1 \cdot (Et_2O)_2]_2$ .

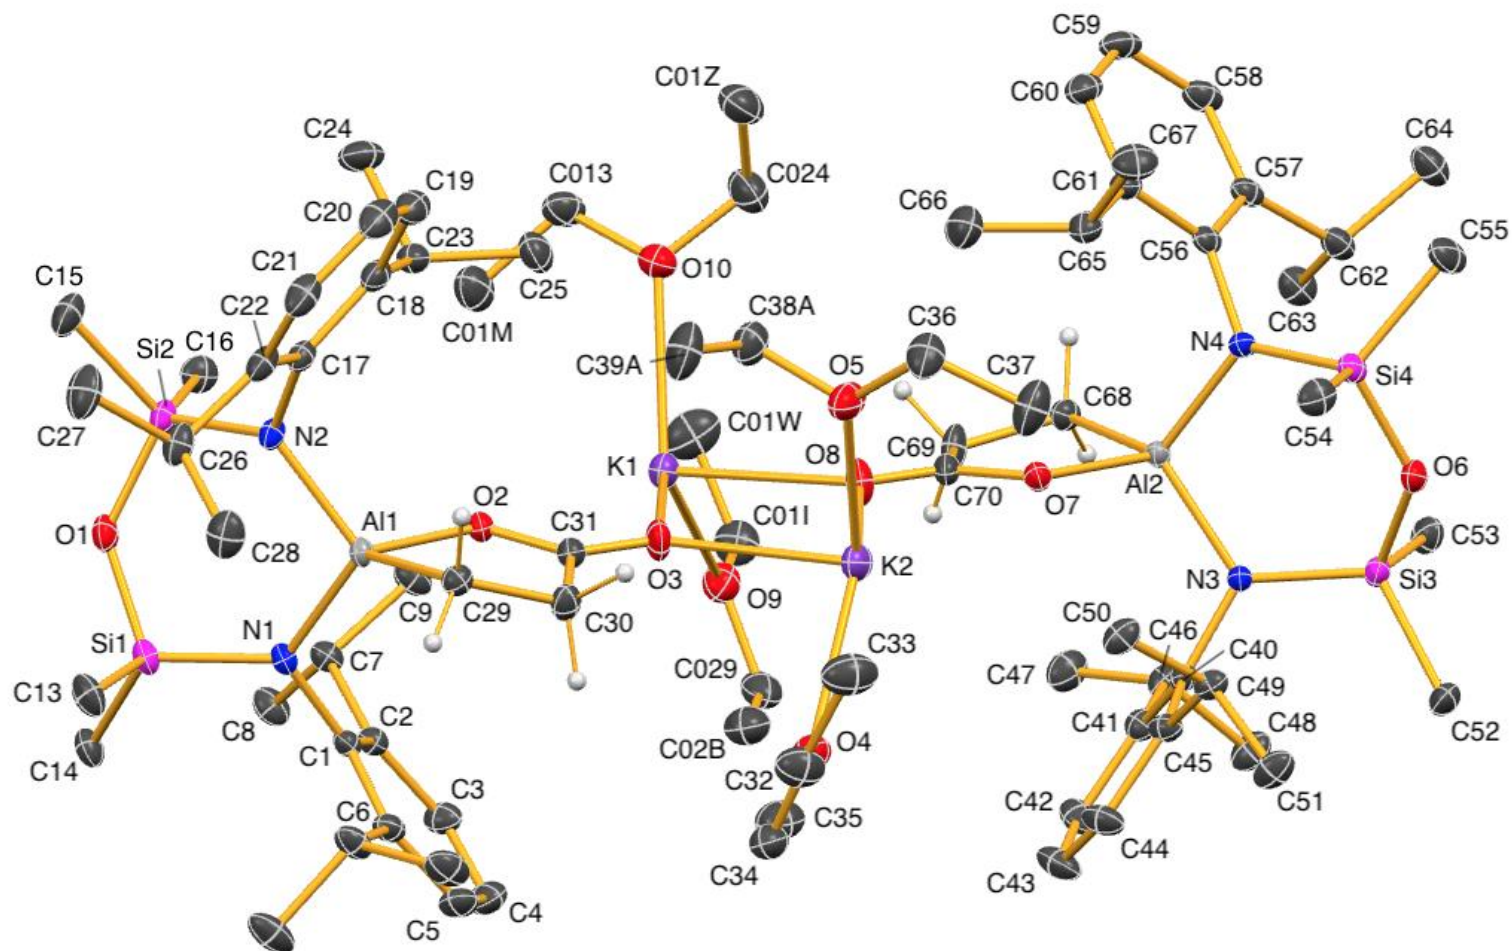

### Synthesis of $K[Al(NON)\{CH_2CH_2C(=NiPr)NiPr\}]$ (**2**)

Diisopropylcarbodiimide (5.0 mg, 0.04 mmol) was added to a solution of  $K[Al(NON)(C_2H_4)]$  (**1**) (22.7 mg, 0.04 mmol) in  $C_6D_6$ . After 8 h at room temperature a pale golden-brown solution had formed that was analysed by  $^1H$  NMR spectroscopy, showing complete conversion to  $K[Al(NON)\{CH_2CH_2C(=NiPr)NiPr\}]$  (**2**). The solution was transferred to a vial and the solvent was removed *in vacuo* to afford **2** as a microcrystalline solid. Crystals suitable for X-ray diffraction were obtained by slow evaporation from a toluene/ $Et_2O$  solution, affording the solvated compound [**2**](**2**· $Et_2O$ ). Yield 26 mg, 88 %.

Elemental analysis: Anal. Calcd. for  $C_{37}H_{64}AlKN_4OSi_2$  (**2**) (703.20): C 63.20, H 9.17, N 7.97 %; Found: C 63.12, H 9.05, N 7.03 %.

$^1H$  NMR (500 MHz,  $C_6D_6$ ):  $\delta$  7.14 (s, 2H,  $C_6H_3$ ), 7.02 (d,  $J = 7.5$ , 2H,  $C_6H_3$ ), 6.91 (t,  $J = 7.5$ , 2H,  $C_6H_3$ ), 4.39 (sept,  $J = 6.7$ , 2H,  $CHMe_2$ ), 4.31 (sept,  $J = 6.7$ , 2H,  $CHMe_2$ ), 3.50 (sept,  $J = 6.0$ , 1H,  $CHMe_2$ ), 3.14 (sept,  $J = 6.7$ , 1H,  $CHMe_2$ ), 2.44 (t,  $J = 7.7$ , 2H,  $CH_2$ ), 1.46 (d,  $J = 6.7$ , 6H,  $CHMe_2$ ), 1.36 (m, 12H,  $CHMe_2$ ), 1.21 (d,  $J = 6.7$ , 6H,  $CHMe_2$ ), 0.91 (d,  $J = 6.7$ , 6H,  $CHMe_2$ ), 0.72 (d,  $J = 6.0$ , 6H,  $CHMe_2$ ), 0.55 (s, 6H,  $SiMe_2$ ), 0.51 (s, 6H,  $SiMe_2$ ), 0.36 (br t, 2H,  $CH_2$ ).

$^{13}C\{^1H\}$  NMR (126 MHz,  $C_6D_6$ ):  $\delta$  174.2 (C=N), 148.3, 148.0, 147.9, 124.0, 123.9, 121.8 ( $C_6H_3$ ), 47.2 (NCHMe<sub>2</sub>), 46.8 (NCHMe<sub>2</sub>), 28.8 (AlCH<sub>2</sub>CH<sub>2</sub>), 27.7, 27.7 (CHMe<sub>2</sub>), 27.6, 27.2, 26.3, 26.2, 26.0, 23.3 (CHMe<sub>2</sub>), 4.7, 4.0 ( $SiMe_2$ ) 3.3 (AlCH<sub>2</sub>).

IR (solid,  $cm^{-1}$ ): 2963 (m), 2869 (br m), 1604 (m,  $\nu_{CN}$ ), 1587 (m,  $\nu_{CN}$ ), 1462 (w), 1427 (m), 1390 (w), 1381 (w), 1247 (m), 1174 (m), 1106 (w), 1040 (w), 1004 (br m), 976 (br m), 929 (s), 911 (s), 880 (m), 846 (s), 822 (s), 792 (vs), 781 (vs), 746 (m), 704 (s), 676 (s), 642 (w), 629 (m), 576 (w), 449 (w), 432 (w).

**Figure S7**  $^1\text{H}$  NMR spectrum (500 MHz,  $\text{C}_6\text{D}_6$ ) of  $\text{K}[\text{Al}(\text{NON})\{\text{CH}_2\text{CH}_2\text{C}(\text{=N}/\text{Pr})\text{N}/\text{Pr}\}]$  (**2**). DIC = diisopropylcarbodiimide.

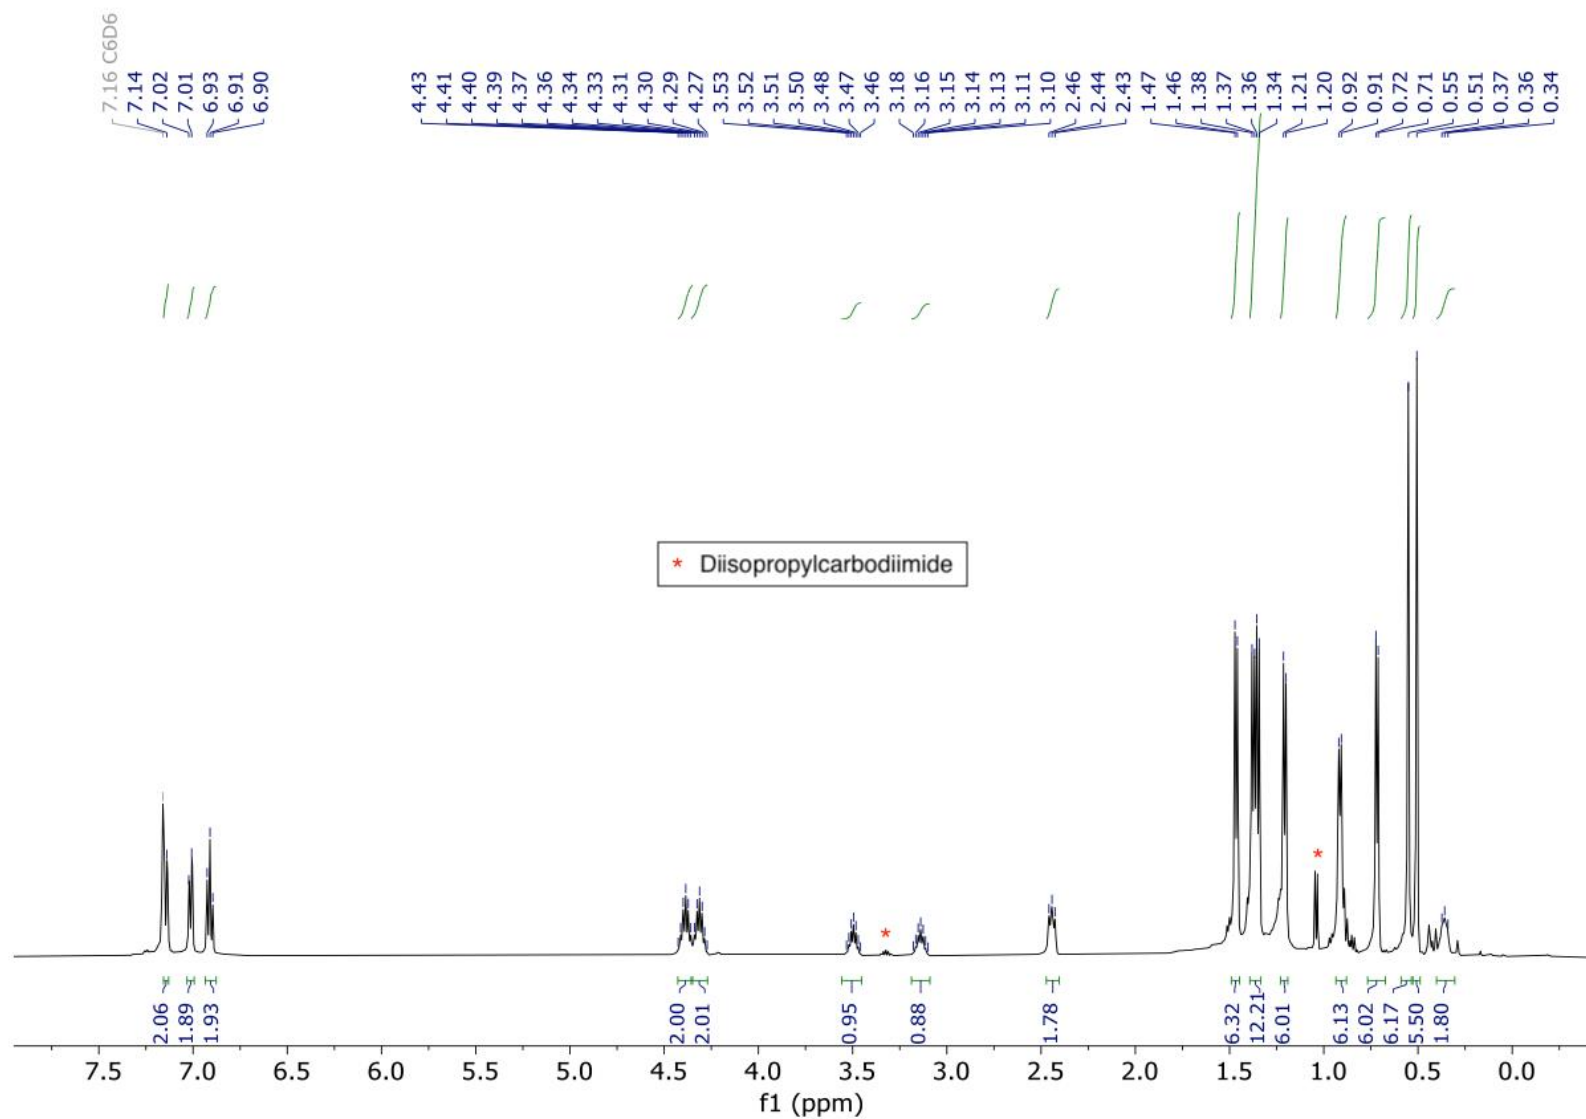

**Figure S8**  $^{13}\text{C}\{^1\text{H}\}$  NMR spectrum (126 MHz,  $\text{C}_6\text{D}_6$ ) of  $\text{K}[\text{Al}(\text{NON})\{\text{CH}_2\text{CH}_2\text{C}(\text{=NiPr})\text{NiPr}\}]$  (**2**).

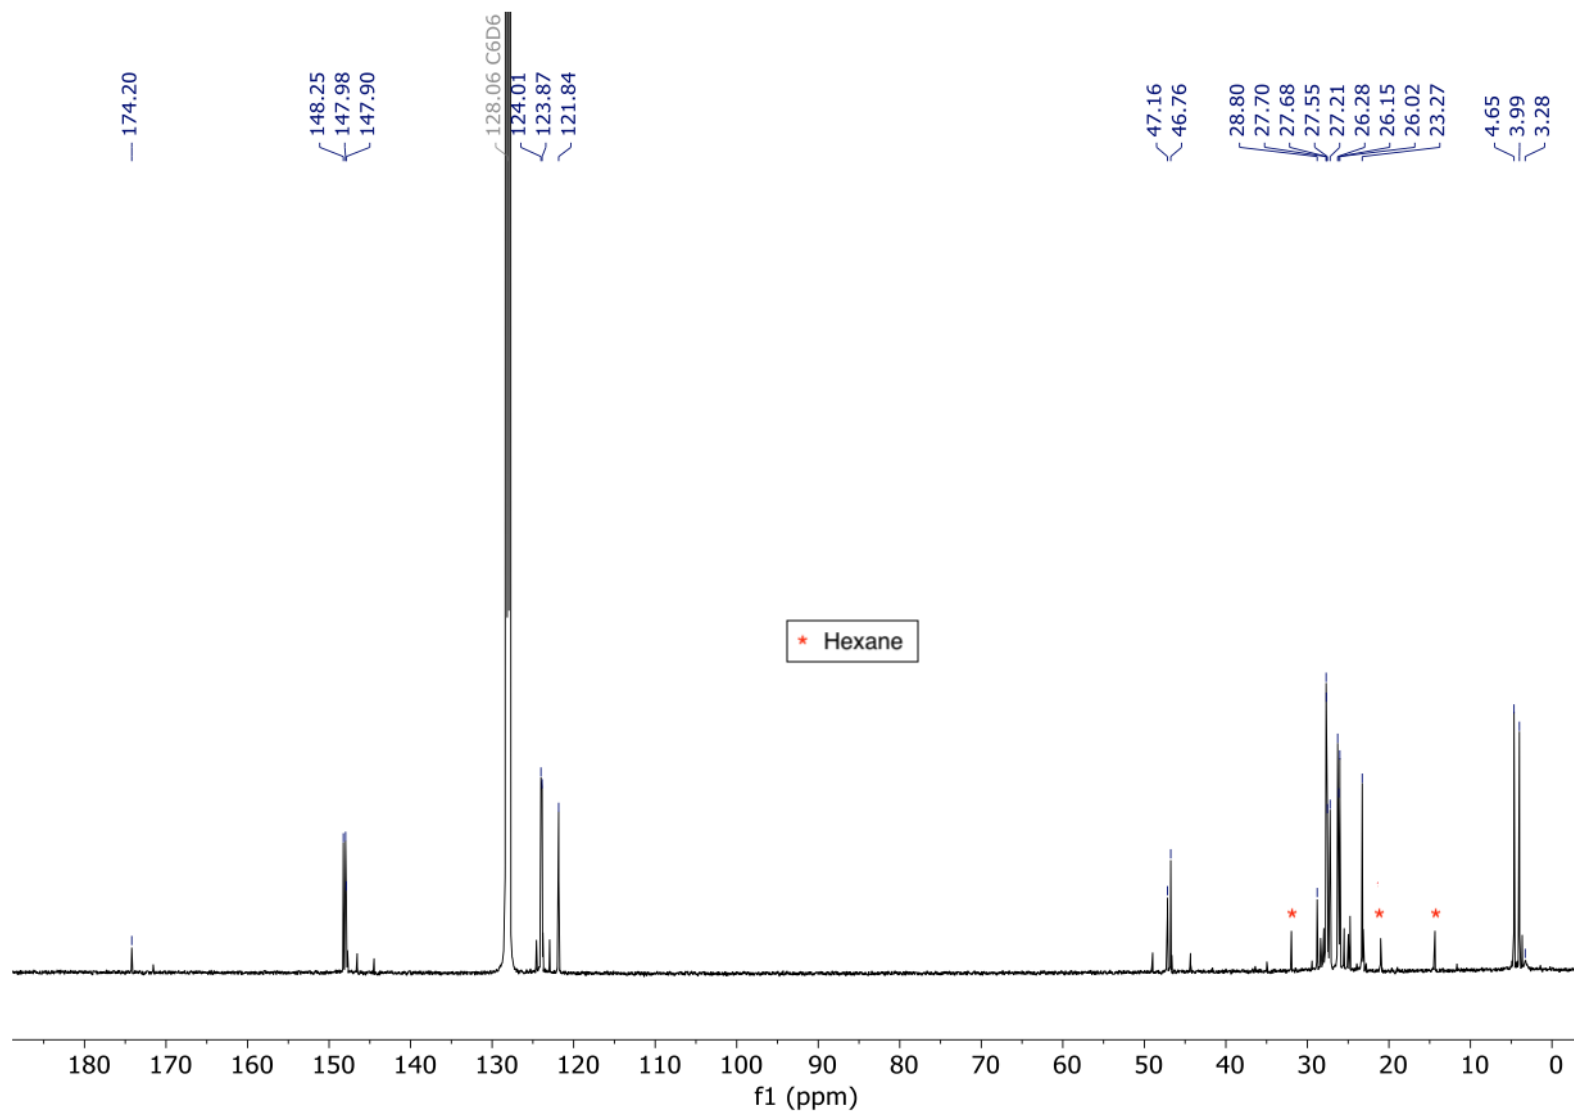

**Figure S9** IR spectrum (solid,  $\text{cm}^{-1}$ ) of  $\text{K}[\text{Al}(\text{NON})\{\text{CH}_2\text{CH}_2\text{C}(\text{=N}i\text{Pr})\text{N}i\text{Pr}\}]$  (**2**).

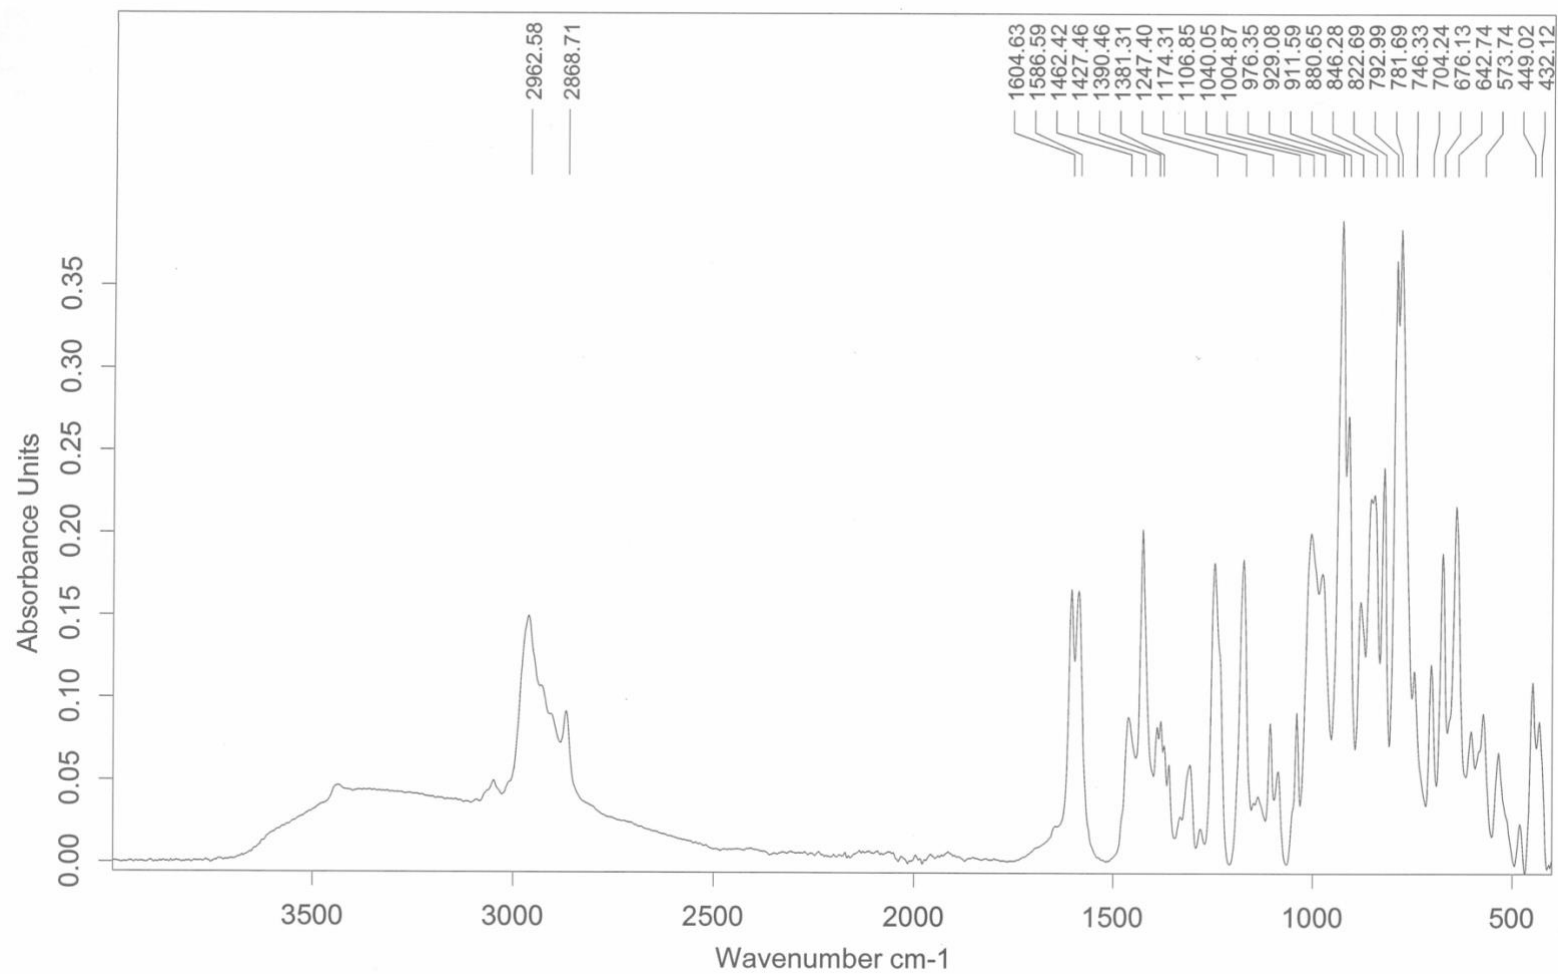

**Figure S10** ORTEP (ellipsoids 30%, H-atoms {except  $CH_2$  of metallacycle}, disordered atoms and toluene solvate omitted), of the asymmetric unit of  $[K(Et_2O)][Al(NON)(CH_2CH_2C(=N*i*Pr)N*i*Pr)]K[Al(NON)(CH_2CH_2C(=N*i*Pr)N*i*Pr)] [(2·Et<sub>2</sub>O)(2)]$ .

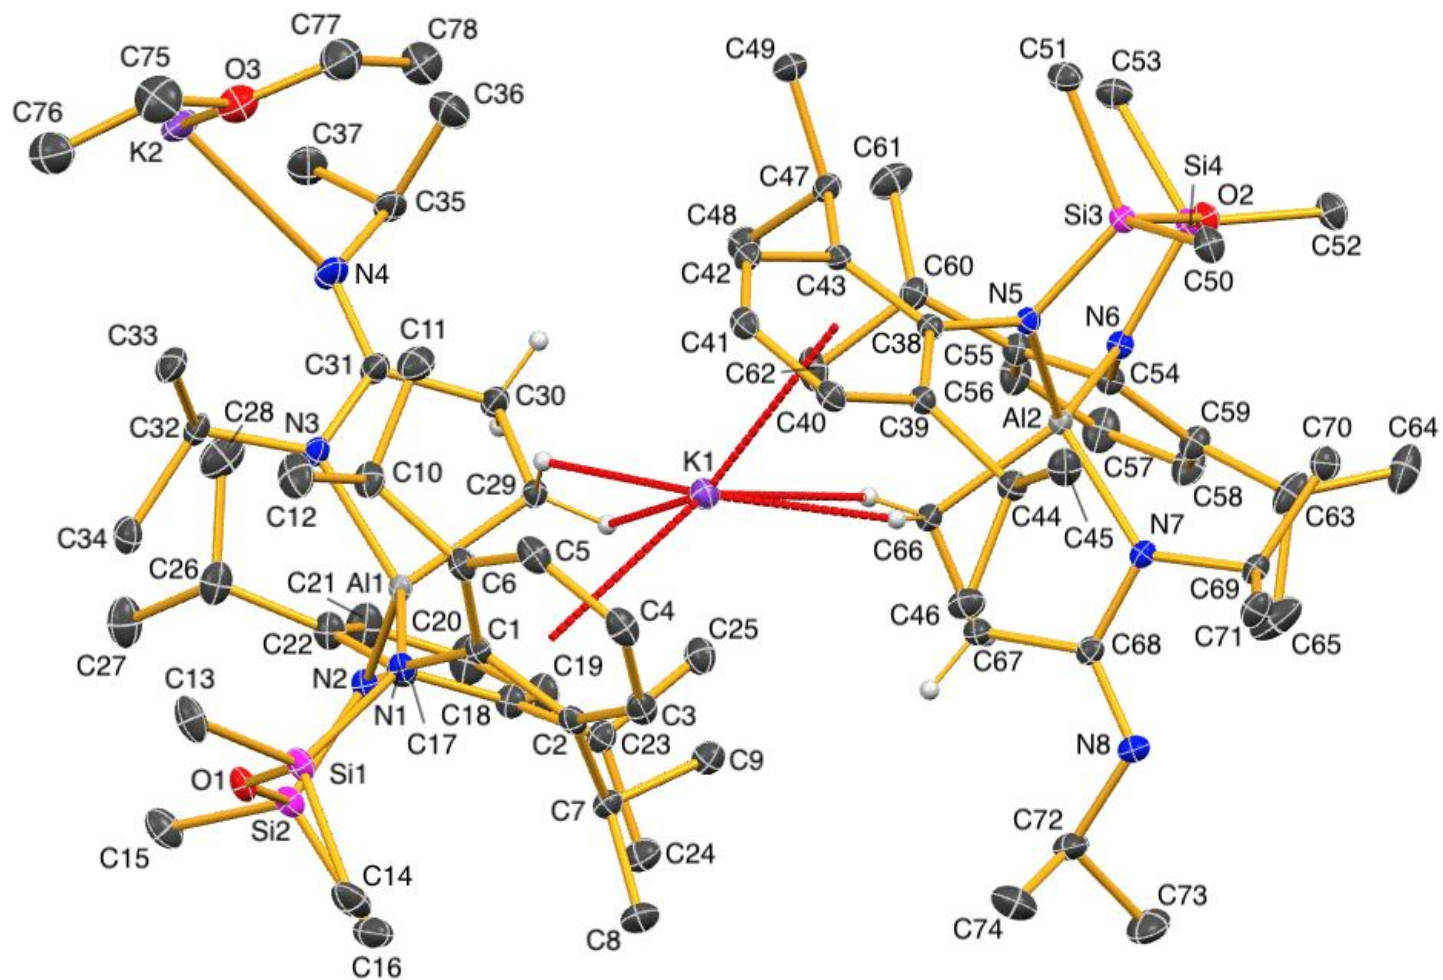

### Synthesis of $K[Al(NNO)\{CH_2CH_2C(=N*i*Pr)N*i*Pr\}]$ (**3**)

A solution of **2** (14.1 mg, 0.02 mmol) in  $C_6D_6$  (0.6 mL) was transferred to an NMR tube fitted with a J. Young's Teflon tap and heated to 80 °C. Reaction progress was monitored by  $^1H$  NMR spectroscopy, showing complete conversion after for 2 days. The reaction mixture was transferred to a scintillation vial and the solvent was reduced *in vacuo*. Crystals suitable for X-ray diffraction were obtained by slow evaporation from benzene. Yield = 4.1 mg, 29 %.

Elemental analysis: Anal. Calcd. for  $C_{37}H_{64}AlKN_4OSi_2$  (703.20): C 63.20, H 9.17, N 7.97 %; Found: C 63.76, H 7.76, N 7.34 %.

$^1H$  NMR (500 MHz,  $C_6D_6$ ):  $\delta$  7.31 – 7.11 (m, 6H,  $C_6H_3$ ), 4.30 (sept,  $J = 6.7$ , 1H,  $CHMe_2$ ), 4.18 (sept,  $J = 6.7$ , 1H,  $CHMe_2$ ), 4.02 (sept,  $J = 6.7$ , 1H,  $CHMe_2$ ), 3.92 (sept,  $J = 6.7$ , 1H,  $CHMe_2$ ), 3.63 (sept,  $J = 6.7$ , 1H,  $CHMe_2$ ), 3.54 (sept,  $J = 6.2$ , 1H,  $CHMe_2$ ), 2.52 (m, 1H,  $CH_2$ ), 2.00 (m, 1H,  $CH_2$ ), 1.55 (t,  $J = 6.7$  Hz, 6H,  $CHMe_2$ ), 1.52 (d,  $J = 6.7$  Hz, 3H,  $CHMe_2$ ), 1.47 (m, 6H,  $CHMe_2$ ), 1.42 (m, 15H,  $CHMe_2$ ), 1.12 (d,  $J = 6.2$ , 3H,  $CHMe_2$ ), 0.90 (d, 3H,  $CHMe_2$ ) \*partial overlap with solvent peak, 0.73 (s, 3H,  $SiMe_2$ ), 0.36 (s, 3H,  $SiMe_2$ ), 0.13 (m, 1H,  $CH_2$ ), 0.07 (s, 3H,  $SiMe_2$ ), 0.01 (s, 3H,  $SiMe_2$ ), -0.47 (m, 1H,  $CH_2$ ).

$^{13}C\{^1H\}$  NMR (126 MHz,  $C_6D_6$ ):  $\delta$  170.3 (C=N), 149.0, 148.4, 147.2, 146.9, 145.6, 141.4, 125.3, 124.9, 124.6, 124.2, 124.1, 123.0 ( $C_6H_3$ ) 47.3, 45.1 ( $CHMe_2$ ), 28.3 ( $CHMe_2$ ), 28.0, 27.9, 27.5 ( $CHMe_2$ ), 27.4 ( $CHMe_2$ ), 27.3 ( $CHMe_2$ ), 27.1, 26.7, 25.9 ( $CHMe_2$ ), 25.9 ( $CH_2$ ), 25.8, 25.1, 24.6, 23.6, 23.2 ( $CHMe_2$ ), 5.8, 5.5, 4.0, 2.9 ( $SiMe_2$ ).

IR (solid,  $cm^{-1}$ ): 3053 (m), 2962 (m), 2868 (m), 1608 (br m,  $\nu_{CN}$ ), , 1459 (w), 1429 (m), 1381 (br w), 1312 (w), 1245 (m), 1172 (m), 1100 (m), 1040 (s), 961 (br vs), 926 (vs), 792 (s), 772 (s), 491 (w), 447 (w).

Figure S11  $^1\text{H}$  NMR spectrum (500 MHz,  $\text{C}_6\text{D}_6$ ) of  $\text{K}[\text{Al}(\text{NNO})\{\text{CH}_2\text{CH}_2\text{C}(\text{=N}i\text{Pr})\text{N}i\text{Pr}\}]$  (**3**).

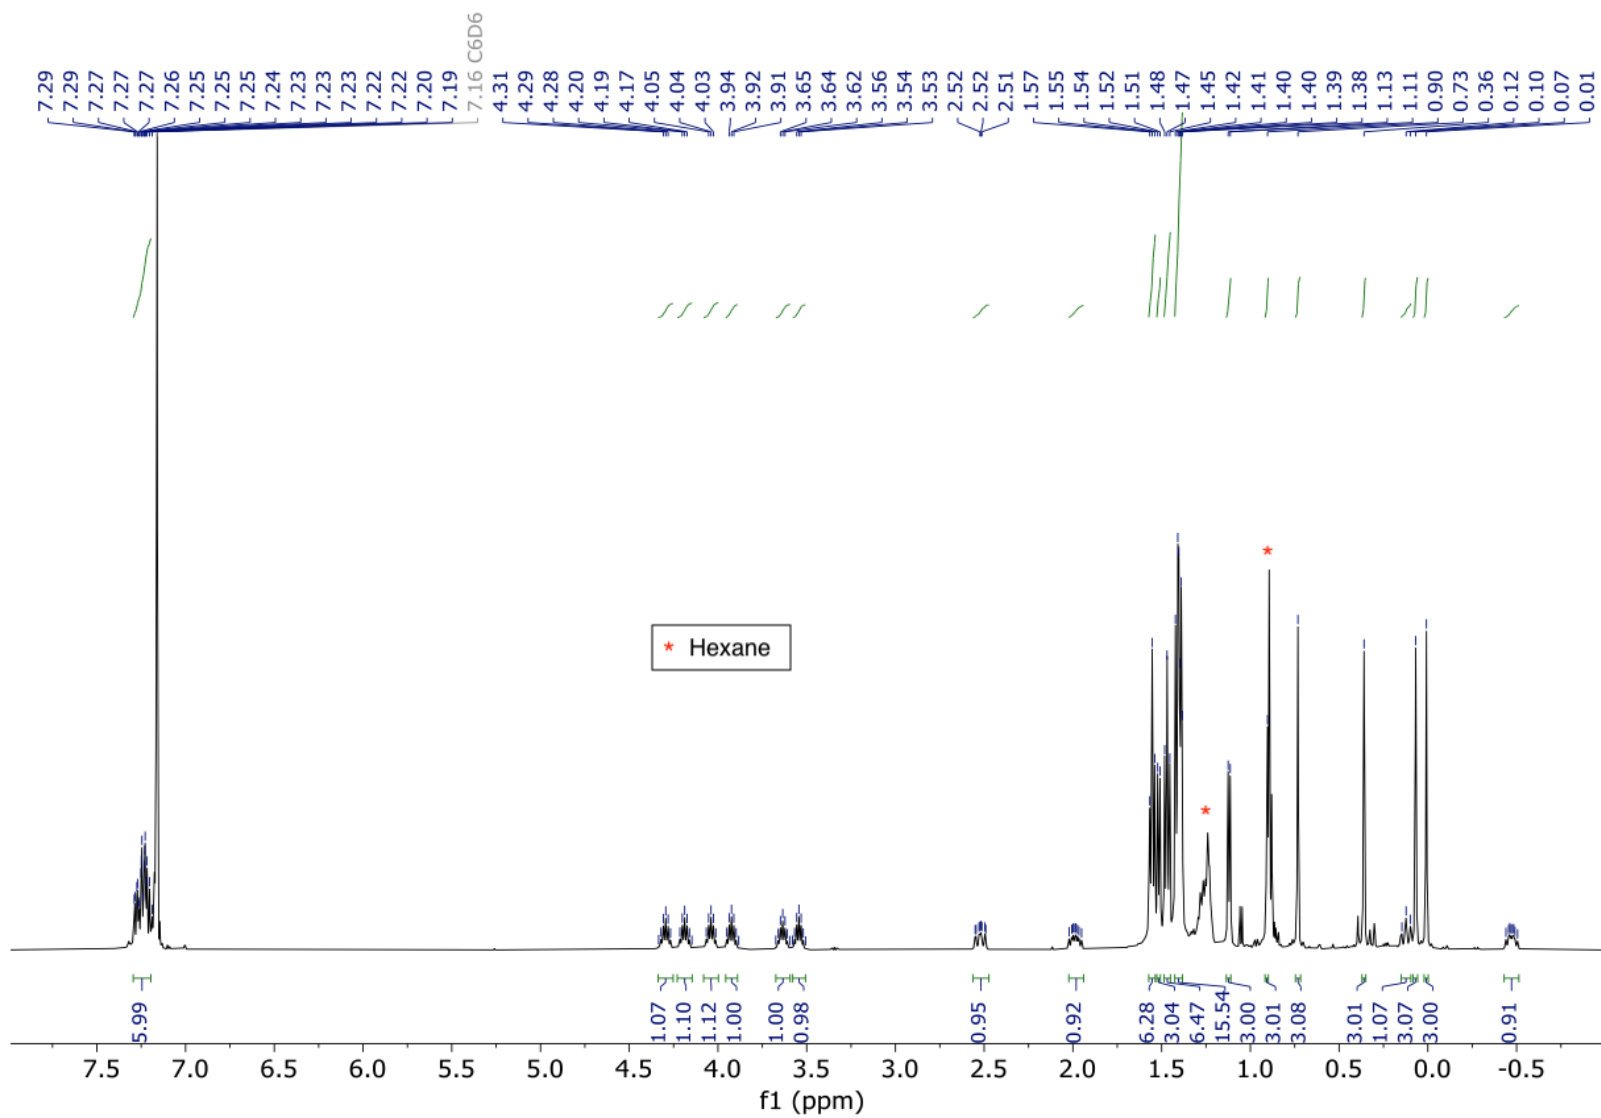



**Figure S12**  $^{13}\text{C}\{^1\text{H}\}$  NMR spectrum (126 MHz,  $\text{C}_6\text{D}_6$ ) of  $\text{K}[\text{Al}(\text{NNO})\{\text{CH}_2\text{CH}_2\text{C}(\text{=NiPr})\text{NiPr}\}]$  (**3**).

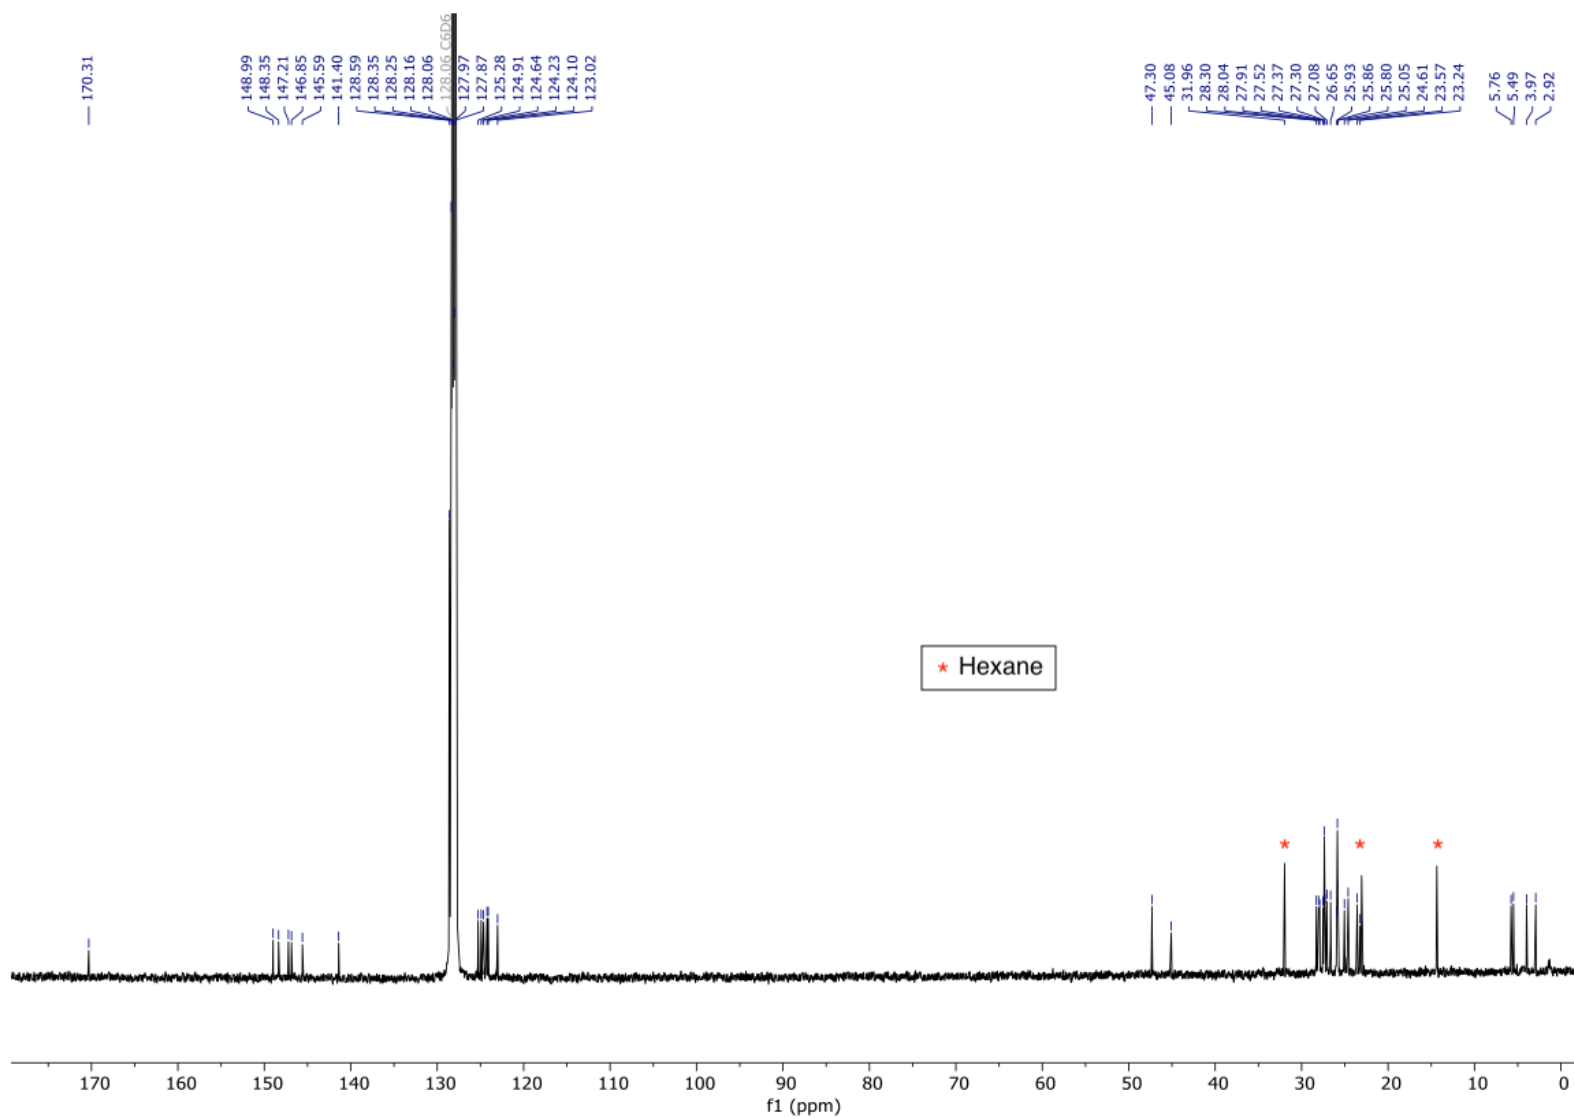

**Figure S13**  $^1\text{H}$  NMR spectra (500 MHz,  $\text{C}_6\text{D}_6$ , 353 K) charting the conversion of  $\text{K}[\text{Al}(\text{NON})\{\text{CH}_2\text{CH}_2\text{C}(=\text{NiPr})\text{NiPr}\}]$  (**2**)  $\text{K}[\text{Al}(\text{NNO})\{\text{CH}_2\text{CH}_2\text{C}(=\text{NiPr})\text{NiPr}\}]$  (**3**).

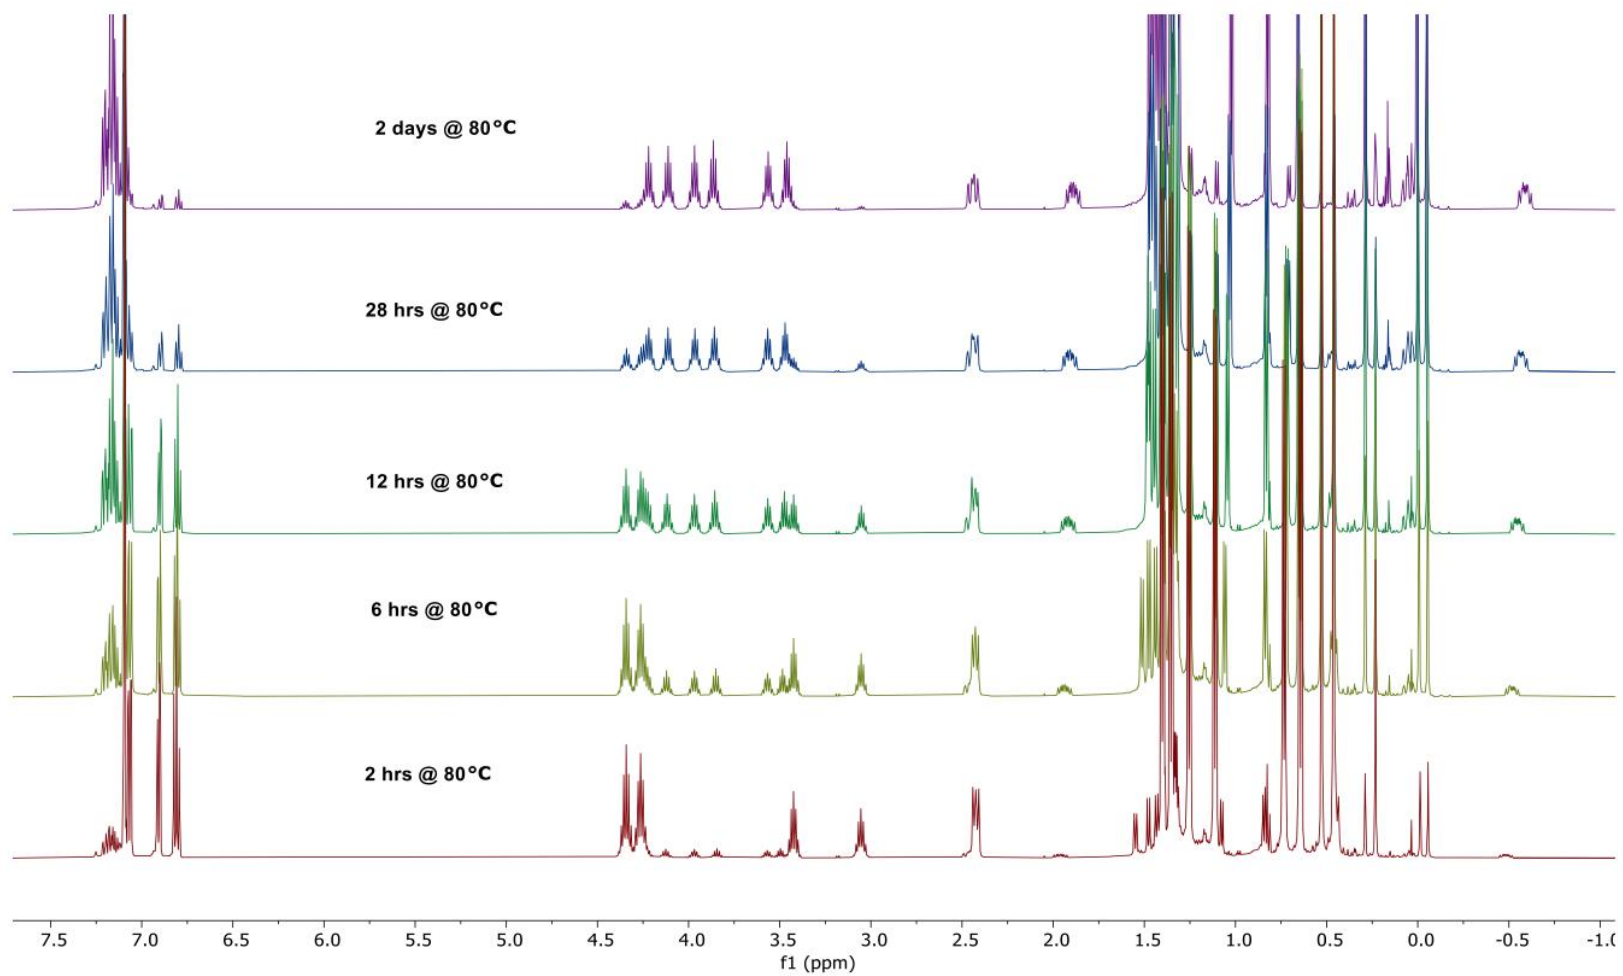

**Figure S14** IR spectrum (solid,  $\text{cm}^{-1}$ ) of  $\text{K}[\text{Al}(\text{NNO})\{\text{CH}_2\text{CH}_2\text{C}(\text{=N}i\text{Pr})\text{N}i\text{Pr}\}]$  (**3**).

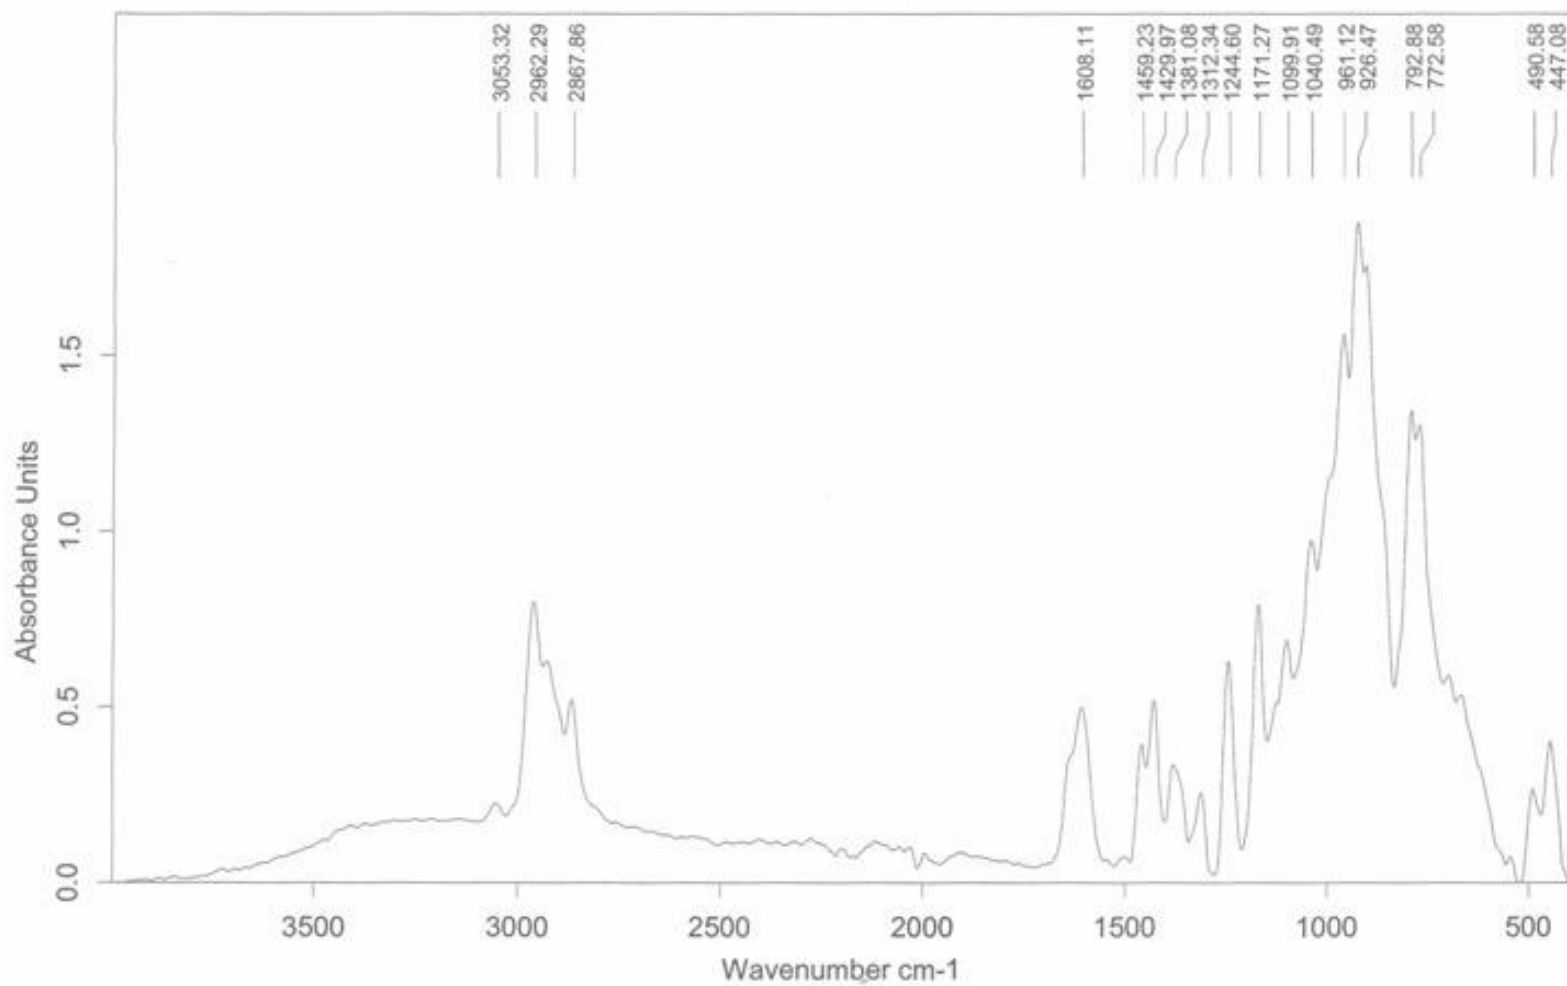

**Figure S14** ORTEP (ellipsoids 30%, H-atoms {except  $\text{CH}_2$  of metallacycle} omitted), of the asymmetric unit of  $[\text{K}(\text{C}_6\text{H}_6)][\text{Al}(\text{NNO})(\text{CH}_2\text{CH}_2\text{C}=\text{NiPr}\}\text{NiPr}] \mathbf{3} \cdot (\text{C}_6\text{H}_6)$

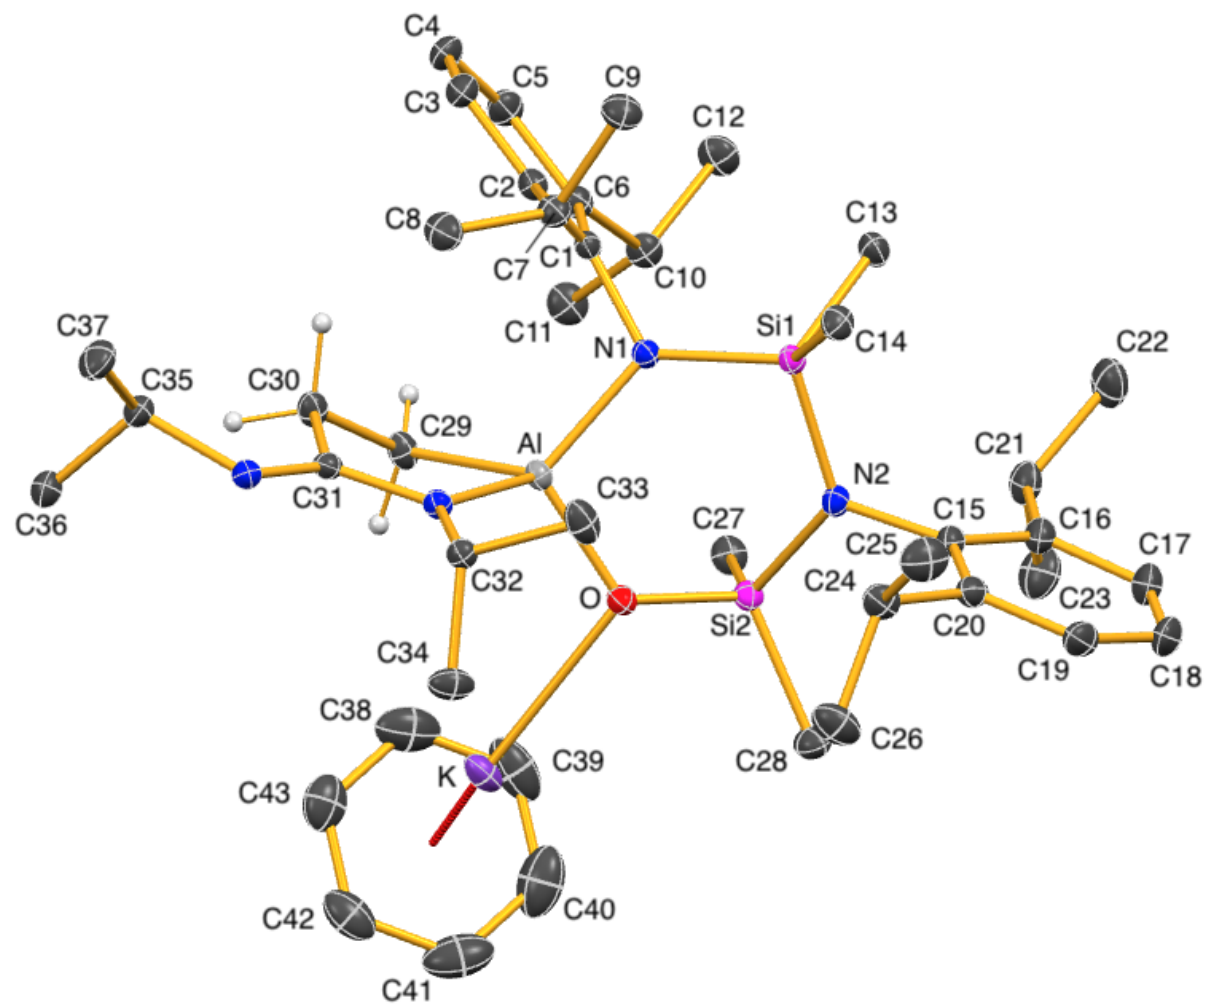

**Figure S15** ORTEP (ellipsoids 30%, H-atoms {except  $CH_2$  of metallacycle} omitted), of dimer unit of  $[\{K(C_6H_6)\}\{Al\{NNO\}\{CH_2CH_2C(=N^iPr)N^iPr\}\}]_2 \cdot 2(C_6H_6)$ .

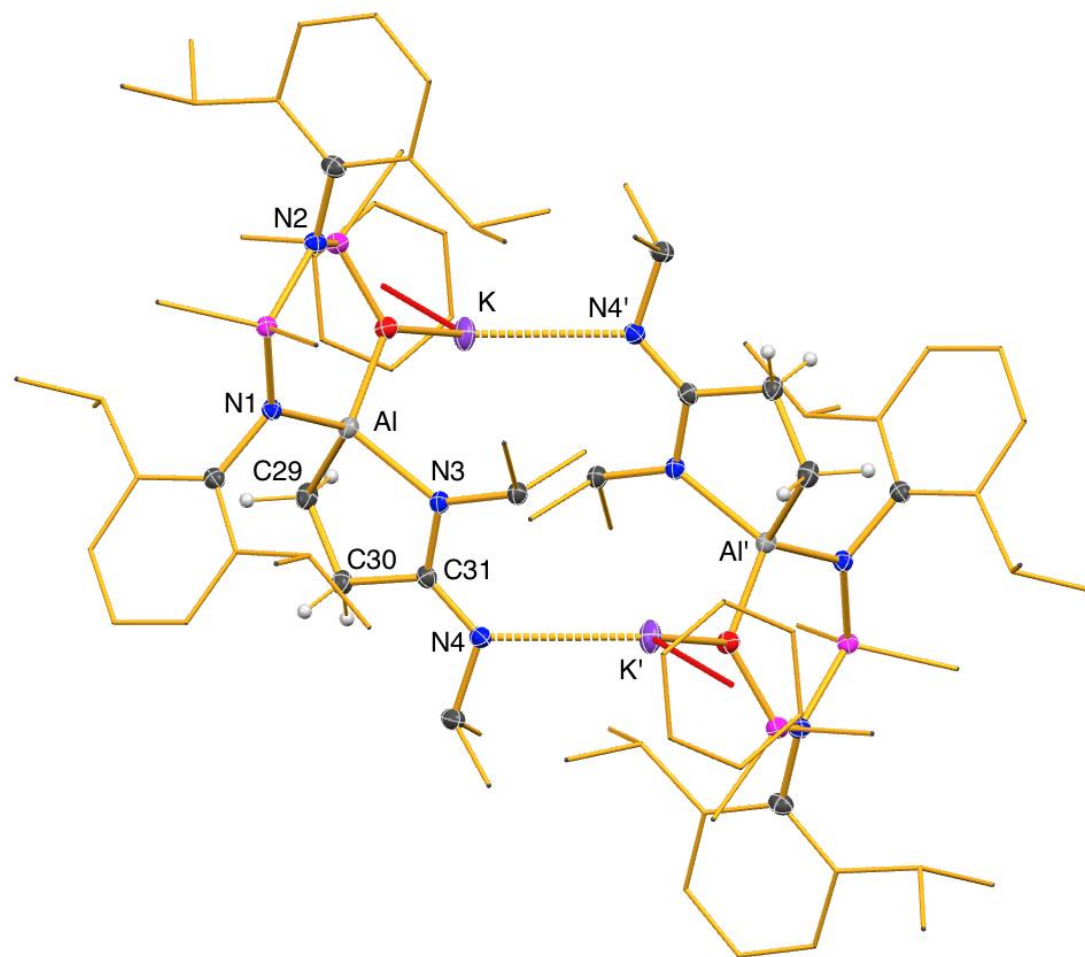

**Figure S16** Summary of % volume buried calculations<sup>[S2]</sup> for the 'Al(NON)' fragment

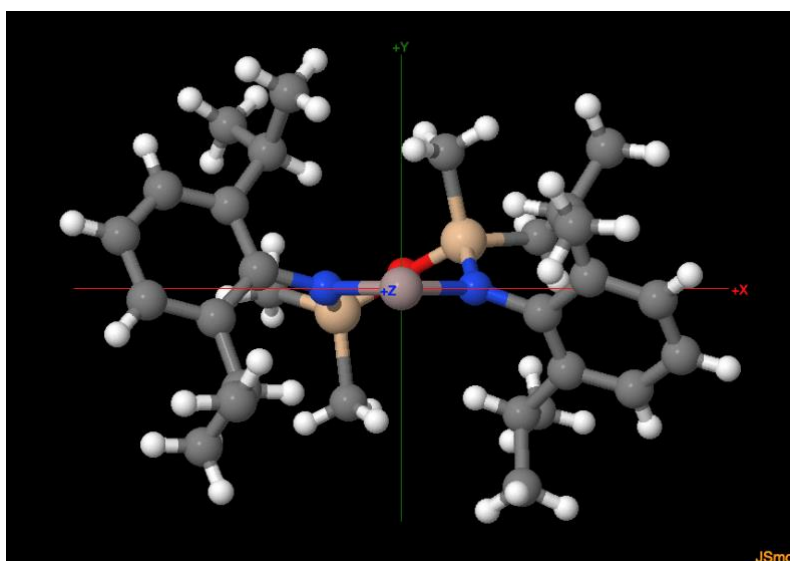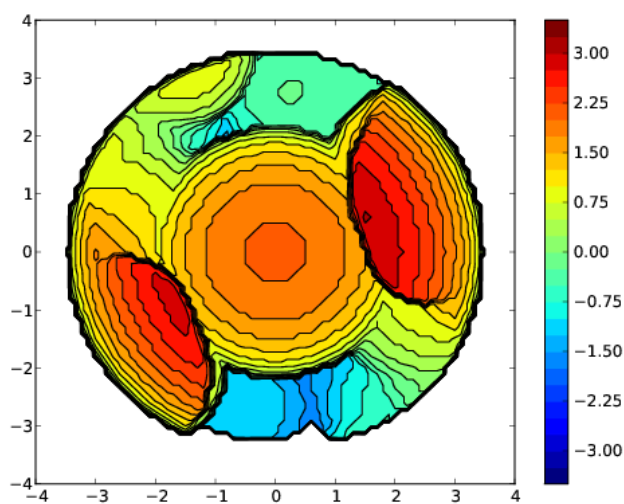

| <b>%V Free</b> | <b>%V Buried</b> | <b>% V Tot/V Ex</b> |
|----------------|------------------|---------------------|
| 27.3           | 72.7             | 99.9                |

| <b>Quadrant</b> | <b>V f</b> | <b>V b</b> | <b>V t</b> | <b>%V f</b> | <b>%V b</b> |
|-----------------|------------|------------|------------|-------------|-------------|
| SW              | 10.1       | 34.7       | 44.9       | 22.6        | 77.4        |
| NW              | 13.7       | 31.1       | 44.9       | 30.6        | 69.4        |
| NE              | 8.9        | 36.0       | 44.9       | 19.8        | 80.2        |
| SE              | 16.3       | 28.6       | 44.9       | 36.3        | 63.7        |

**Figure S17** Summary of % volume buried calculations<sup>[S2]</sup> for the 'Al(NNO)' fragment

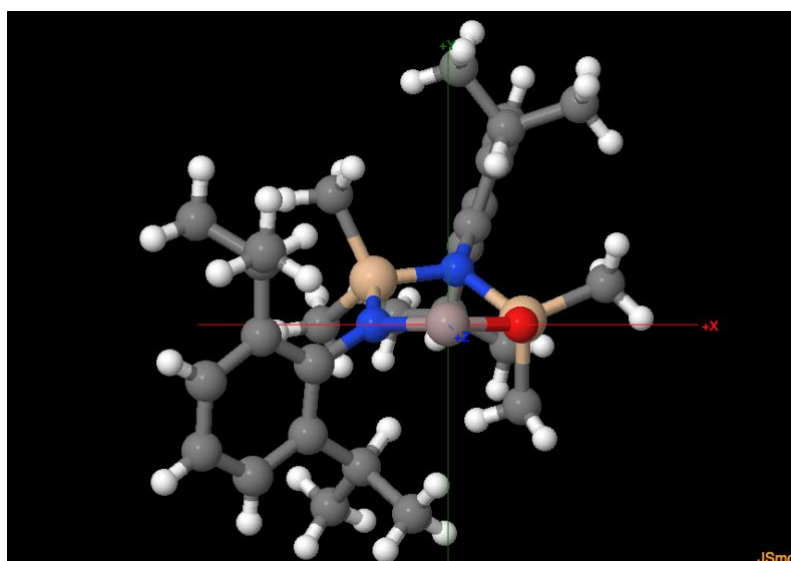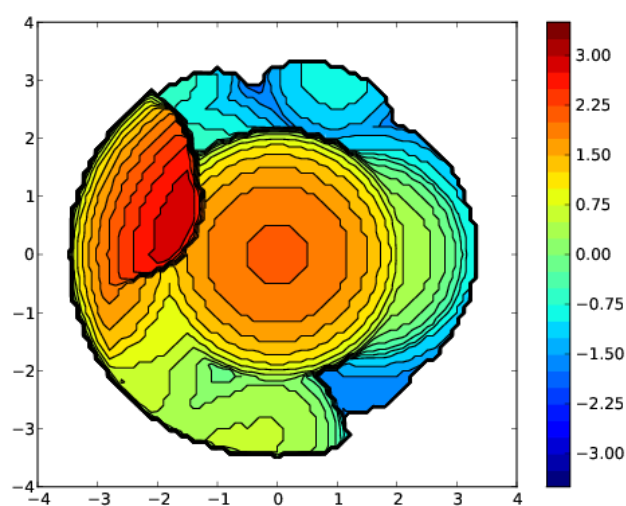

| <b>%V Free</b> | <b>%V Buried</b> | <b>% V Tot/V Ex</b> |
|----------------|------------------|---------------------|
| 36.7           | <b>63.3</b>      | 99.9                |

| <b>Quadrant</b> | <b>V f</b> | <b>V b</b> | <b>V t</b> | <b>%V f</b> | <b>%V b</b> |
|-----------------|------------|------------|------------|-------------|-------------|
| SW              | 11.7       | 33.2       | 44.9       | <b>26.0</b> | 74.0        |
| NW              | 11.7       | 33.1       | 44.9       | <b>26.1</b> | 73.9        |
| NE              | 21.8       | 23.1       | 44.9       | <b>48.6</b> | 51.4        |
| SE              | 20.7       | 24.2       | 44.9       | <b>46.1</b> | 53.9        |

## Crystallographic Details

Crystals were covered in inert oil and suitable single crystals were selected under a microscope and mounted on an Agilent SuperNova diffractometer fitted with an EOS S2 detector. Data were collected at 150 K (unless indicated otherwise) using focused microsource Cu K $\alpha$  radiation at 1.54184 Å. Intensities were corrected for Lorentz and polarisation effects and for absorption using multi-scan methods.<sup>[S3]</sup> Space groups were determined from systematic absences and checked for higher symmetry. All structures were solved using direct methods with SHELXS,<sup>[S4]</sup> refined on  $F^2$  using all data by full matrix least-squares procedures with SHELXL-97,<sup>[S5]</sup> within the OLEX2 ([**1·(Et<sub>2</sub>O)**]<sub>2</sub>)<sup>[S6]</sup> or WinGX ([**2·Et<sub>2</sub>O**](**2**)) and **3·C<sub>6</sub>H<sub>6</sub>**)<sup>[S7]</sup> programs. Non-hydrogen atoms were refined with anisotropic displacement parameters. Hydrogen atoms were placed in calculated positions or manually assigned from residual electron density where appropriate, unless otherwise stated. The functions minimized were  $\sum w(F_2o - F_2c)$ , with  $w = [\sigma^2(F_2o) + aP^2 + bP]^{-1}$ , where  $P = [\max(F_0)^2 + 2F_2c]/3$ . The isotropic displacement parameters are 1.2 or 1.5 times the isotropic equivalent of their carrier atoms.

### *Additional Information:*

[**1·(Et<sub>2</sub>O)**]<sub>2</sub>: The crystal was twinned with a two-fold rotation twin law with the ratio of components refining to 0.5100(7) / 0.4900(7).

[**2·Et<sub>2</sub>O**](**2**): One of the *i*Pr groups is disordered and was modelled over two positions with the lower occupancy orientation having isotopic C and N atoms and C–C bond lengths restrained to be equal using the SADI command.



**Table S1** Crystal structure and refinement data for **[1·(Et<sub>2</sub>O)<sub>2</sub>]<sub>2</sub>**, **[(2·Et<sub>2</sub>O)(2)]** and **3·C<sub>6</sub>H<sub>6</sub>**

|                                                     | <b>[1·(Et<sub>2</sub>O)<sub>2</sub>]<sub>2</sub></b>                                                           | <b>[(2·Et<sub>2</sub>O)(2)]</b>                                                                               | <b>3·C<sub>6</sub>H<sub>6</sub></b>                                                                            |
|-----------------------------------------------------|----------------------------------------------------------------------------------------------------------------|---------------------------------------------------------------------------------------------------------------|----------------------------------------------------------------------------------------------------------------|
| Empirical formula                                   | C <sub>78</sub> H <sub>140</sub> Al <sub>2</sub> K <sub>2</sub> N <sub>4</sub> O <sub>10</sub> Si <sub>4</sub> | C <sub>85</sub> H <sub>146</sub> Al <sub>2</sub> K <sub>2</sub> N <sub>8</sub> O <sub>3</sub> Si <sub>4</sub> | C <sub>116</sub> H <sub>170</sub> Al <sub>2</sub> K <sub>2</sub> N <sub>8</sub> O <sub>2</sub> Si <sub>4</sub> |
| CCDC Number                                         | 2310396                                                                                                        | 2310397                                                                                                       | 2310398                                                                                                        |
| <i>M<sub>r</sub></i>                                | 1538.45                                                                                                        | 1572.61                                                                                                       | 1953.11                                                                                                        |
| <i>T</i> [K]                                        | 120.0(1)                                                                                                       | 120.0(1)                                                                                                      | 120.0(1)                                                                                                       |
| Crystal size [mm]                                   | 0.35 × 0.25 × 0.22                                                                                             | 0.27 × 0.26 × 0.19                                                                                            | 0.33 × 0.31 × 0.23                                                                                             |
| Crystal system                                      | Monoclinic                                                                                                     | Monoclinic                                                                                                    | Monoclinic                                                                                                     |
| Space group                                         | P2 <sub>1</sub> (No. 4)                                                                                        | P2 <sub>1</sub> /c (No. 14)                                                                                   | P2 <sub>1</sub> /c (No. 14)                                                                                    |
| <i>a</i> [Å]                                        | 15.7613(2)                                                                                                     | 21.7767(2)                                                                                                    | 13.45606(16)                                                                                                   |
| <i>b</i> [Å]                                        | 13.63024(18)                                                                                                   | 16.40993(13)                                                                                                  | 23.22737(19)                                                                                                   |
| <i>c</i> [Å]                                        | 21.2238(18)                                                                                                    | 25.5079(2)                                                                                                    | 19.4534(2)                                                                                                     |
| <i>α</i> [°]                                        | 90                                                                                                             | 90                                                                                                            | 90                                                                                                             |
| <i>β</i> [°]                                        | 89.397(3)                                                                                                      | 98.7193(9)                                                                                                    | 108.1459(13)                                                                                                   |
| <i>γ</i> [°]                                        | 90                                                                                                             | 90                                                                                                            | 90                                                                                                             |
| <i>V</i> [Å <sup>3</sup> ]                          | 4559.3(4)                                                                                                      | 9010.03(14)                                                                                                   | 5777.77(11)                                                                                                    |
| <i>Z</i>                                            | 2                                                                                                              | 4                                                                                                             | 2                                                                                                              |
| <i>D</i> <sub>calc.</sub> [mg m <sup>-3</sup> ]     | 1.121                                                                                                          | 1.159                                                                                                         | 1.123                                                                                                          |
| Absorption coefficient [mm <sup>-1</sup> ]          | 2.016                                                                                                          | 2.004                                                                                                         | 1.650                                                                                                          |
| <i>θ</i> range for data collection [°]              | 3.475 to 68.245                                                                                                | 3.668 to 74.744                                                                                               | 3.538 to 73.591                                                                                                |
| Reflections collected                               | 48991                                                                                                          | 122864                                                                                                        | 49574                                                                                                          |
| Independent reflections                             | 24344 [ <i>R</i> <sub>int</sub> 0.053]                                                                         | 18081 [ <i>R</i> <sub>int</sub> 0.035]                                                                        | 11593 [ <i>R</i> <sub>int</sub> 0.030]                                                                         |
| Reflections with <i>I</i> > 2σ( <i>I</i> )          | 23544                                                                                                          | 16660                                                                                                         | 10469                                                                                                          |
| Data/restraints/parameters                          | 24344 / 2 / 954                                                                                                | 18081 / 2 / 1019                                                                                              | 11593 / 0 / 636                                                                                                |
| Final <i>R</i> indices [ <i>I</i> > 2σ( <i>I</i> )] | <i>R</i> <sub>1</sub> = 0.027, <i>wR</i> <sub>2</sub> = 0.074                                                  | <i>R</i> <sub>1</sub> = 0.043, <i>wR</i> <sub>2</sub> = 0.114                                                 | <i>R</i> <sub>1</sub> = 0.037, <i>wR</i> <sub>2</sub> = 0.095                                                  |
| Final <i>R</i> indices (all data)                   | <i>R</i> <sub>1</sub> = 0.028, <i>wR</i> <sub>2</sub> = 0.075                                                  | <i>R</i> <sub>1</sub> = 0.047, <i>wR</i> <sub>2</sub> = 0.117                                                 | <i>R</i> <sub>1</sub> = 0.042, <i>wR</i> <sub>2</sub> = 0.100                                                  |
| GOOF on <i>F</i> <sup>2</sup>                       | 1.052                                                                                                          | 1.06                                                                                                          | 1.016                                                                                                          |
| Largest diff. peak/hole [e.Å <sup>-3</sup> ]        | 0.15 and -0.24                                                                                                 | 1.25 and -0.63                                                                                                | 0.32 and -0.42                                                                                                 |

## Computational Details

DFT calculations were run with Gaussian 16 (C.01).<sup>[S8]</sup> The Al, Si and K centres were described with the Stuttgart RECPs and associated basis sets,<sup>[S9]</sup> and the 6-31G\*\* basis set was used for all other atoms (BS1).<sup>[S10]</sup> A polarization function was also added to Al ( $\zeta_d = 0.190$ ), Si ( $\zeta_d = 0.284$ ) and K ( $\zeta_d = 1.000$ ).<sup>[S11]</sup> Initial BP86 optimizations were performed using the 'grid = ultrafine' option,<sup>[S12]</sup> with all stationary points being fully characterized via analytical frequency calculations as minima (all positive eigenvalues) or transition states (one imaginary eigenvalue), and with intrinsic reaction coordinate calculations confirming the connectivity of the reaction pathway. All energies were recomputed with a larger basis set featuring 6-311++G\*\* basis sets on all atoms (BS2). Corrections for the effect of benzene ( $\epsilon = 2.2706$ ) solvent were run using the polarizable continuum model and BS1<sup>[S13]</sup> using the keyword "scrf=benzene" within Gaussian. Single-point dispersion corrections to the BP86 results employed Grimme's D3 parameter set with Becke-Johnson damping as implemented in Gaussian.<sup>[S14]</sup>

## Breakdown of Energy Contributions

The following tables detail the evolution of the relative energies as the successive corrections to the initial SCF energy are included. Terms used are:

|                                                    |                                                                                   |
|----------------------------------------------------|-----------------------------------------------------------------------------------|
| <b><math>\Delta E_{\text{BS1}}</math></b>          | SCF energy computed with the BP86 functional with BS1                             |
| <b><math>\Delta H_{\text{BS1}}</math></b>          | Enthalpy at 0 K with BS1                                                          |
| <b><math>\Delta G_{\text{BS1}}</math></b>          | Free energy at 298.15 K and 1 atm with BS1                                        |
| <b><math>\Delta G_{\text{BS1}/bnz}</math></b>      | Free energy corrected for benzene solvent with BS1                                |
| <b><math>\Delta G_{\text{BS1}/bnz+D3BJ}</math></b> | Free energy corrected for benzene and dispersion effects with BS1                 |
| <b><math>\Delta E_{\text{BS2}}</math></b>          | SCF energy computed with the BP86 functional with BS2                             |
| <b><math>\Delta G_{bnz}</math></b>                 | Free energy corrected for basis set (BS2), dispersion effects and benzene solvent |

In each case the final data used in the main article are highlighted in bold. Free energies are quoted in kcal mol<sup>-1</sup>, and include all three single point corrections (for BS2, solvation and dispersion).

**Table S2** Relative energies for computed structures. Data in bold are those used in the main text. Free energies are quoted relative to compound **2<sup>DFT</sup>** at 0.0 kcal mol<sup>-1</sup>.

|                                                       | $\Delta E_{\text{BSI}}$ | $\Delta H_{\text{BSI}}$ | $\Delta G_{\text{BSI}}$ | $\Delta G_{\text{BSI}/\text{bnz}}$ | $\Delta G_{\text{BSI}/\text{bnz}+\text{D3BJ}}$ | $\Delta E_{\text{BS2}}$ | $\Delta G_{\text{bnz}}$ |
|-------------------------------------------------------|-------------------------|-------------------------|-------------------------|------------------------------------|------------------------------------------------|-------------------------|-------------------------|
| <b>2<sup>DFT</sup></b>                                | 0.0                     | 0.0                     | 0.0                     | 0.0                                | 0.0                                            | 0.0                     | <b>0.0</b>              |
| <b>2</b><br>(Dimer crystal<br>with Et <sub>2</sub> O) | -32.8                   | -31.9                   | -12.0                   | -24.2                              | -28.1                                          | -25.7                   | <b>-21.0</b>            |
| <b>TS(2<sup>DFT</sup>-A)</b>                          | 9.0                     | 7.5                     | 4.8                     | 11.6                               | 16.1                                           | 8.7                     | <b>15.8</b>             |
| <b>A</b>                                              | 3.6                     | 1.8                     | -3.8                    | 7.3                                | 11.1                                           | 3.0                     | <b>10.5</b>             |
| <b>TS(A-B)</b>                                        | 16.9                    | 16.2                    | 14.6                    | 20.8                               | 24.2                                           | 18.8                    | <b>26.1</b>             |
| <b>B</b>                                              | 7.6                     | 7.8                     | 7.6                     | 11.7                               | 9.4                                            | 9.7                     | <b>11.4</b>             |
| <b>TS(B-C)</b>                                        | 9.8                     | 10.03                   | 11.0                    | 14.4                               | 15.8                                           | 11.2                    | <b>17.2</b>             |
| <b>C</b>                                              | -8.2                    | -8.0                    | -8.0                    | -5.0                               | -8.9                                           | -6.6                    | <b>-7.3</b>             |
| <b>TS(C-3<sup>DFT</sup>)</b>                          | -7.4                    | -7.3                    | -5.8                    | -6.4                               | -6.6                                           | -6.3                    | <b>-5.5</b>             |
| <b>3<sup>DFT</sup></b>                                | -19.6                   | -19.2                   | -19.2                   | -15.9                              | -16.1                                          | -18.1                   | <b>-14.6</b>            |
| <b>3</b><br>(Monomer crystal<br>with benzene)         | -26.6                   | -25.9                   | -16.9                   | -20.5                              | -17.5                                          | -23.0                   | <b>-13.8</b>            |

**Figure S18** Computed free energy profile (BP86-D3BJ(PCM=C<sub>6</sub>H<sub>6</sub>)/BS2//BP86/BS1 in kcal mol<sup>-1</sup>) for 1,3-silyl retro-Brook rearrangement converting K[Al(NON){CH<sub>2</sub>CH<sub>2</sub>C(=N*i*Pr)N*i*Pr}] (**2**<sup>DFT</sup>) to K[Al(NNO){CH<sub>2</sub>CH<sub>2</sub>C(=N*i*Pr)N*i*Pr}] (**3**<sup>DFT</sup>).

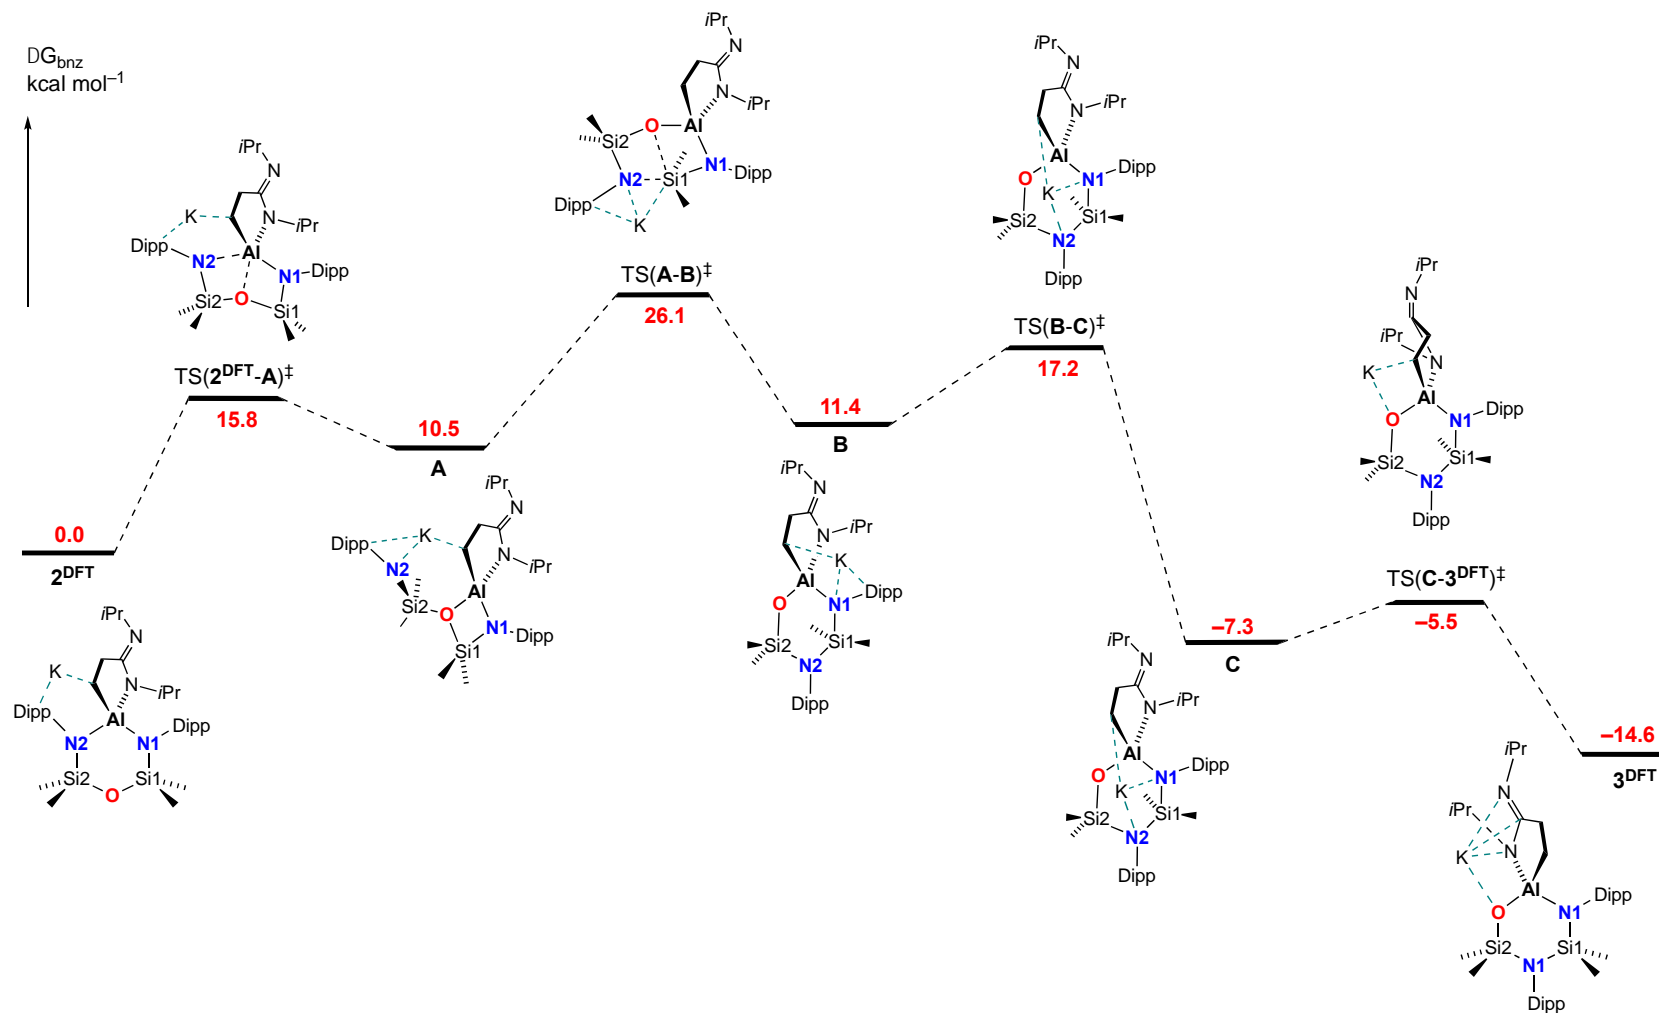

## References

- S1 M. J. Evans, S. E. Neale, M. D. Anker, C. L. McMullin and M. P. Coles, *Angew. Chem. Int. Ed.*, 2022, **61**, e202117396.
- S2 L. Falivene, Z. Cao, A. Petta, L. Serra, A. Poater, R. Oliva, V. Scarano and L. Cavallo, *Nat. Chem.*, 2019, **11**, 872-879.
- S3 R. Blessing, *Acta Cryst.* **1995**, *A51*, 33-38.
- S4 G. M. Sheldrick, *Acta Cryst.* **2008**, *A64*, 112-122.
- S5 SHELXL-97, G. M. Sheldrick, University of Gottingen, Germany, 1997.
- S6 O. V. Dolomanov, L. J. Bourhis, R. J. Gildea, J. A. K. Howard and H. Puschmann, *J. Appl. Cryst.* **2009**, *42*, 339-341.
- S7 L. J. Farrugia, *J. Appl. Cryst.* **1999**, *32*, 837-838.
- S8 Gaussian 16 Revision C.01, M. J. Frisch, G. W. Trucks, H. B. Schlegel, G. E. Scuseria, M. A. Robb, J. R. Cheeseman, G. Scalmani, V. Barone, G. A. Petersson, H. Nakatsuji, X. Li, M. Caricato, A. V. Marenich, J. Bloino, B. G. Janesko, R. Gomperts, B. Mennucci, H. P. Hratchian, J. V. Ortiz, A. F. Izmaylov, J. L. Sonnenberg, Williams, F. Ding, F. Lipparini, F. Egidi, J. Goings, B. Peng, A. Petrone, T. Henderson, D. Ranasinghe, V. G. Zakrzewski, J. Gao, N. Rega, G. Zheng, W. Liang, M. Hada, M. Ehara, K. Toyota, R. Fukuda, J. Hasegawa, M. Ishida, T. Nakajima, Y. Honda, O. Kitao, H. Nakai, T. Vreven, K. Throssell, J. A. Montgomery Jr., J. E. Peralta, F. Ogliaro, M. J. Bearpark, J. J. Heyd, E. N. Brothers, K. N. Kudin, V. N. Staroverov, T. A. Keith, R. Kobayashi, J. Normand, K. Raghavachari, A. P. Rendell, J. C. Burant, S. S. Iyengar, J. Tomasi, M. Cossi, J. M. Millam, M. Klene, C. Adamo, R. Cammi, J. W. Ochterski, R. L. Martin, K. Morokuma, O. Farkas, J. B. Foresman, D. J. Fox, Wallingford, CT, 2016.
- S9 D. Andrae, U. H au ermann, M. Dolg, H. Stoll and H. Preu , *Theor. Chim. Acta* **1990**, *77*, 123-141.
- S10 a) W. J. Hehre, R. Ditchfield and J. A. Pople, *J. Chem. Phys.* **1972**, *56*, 2257-2261; b) P. C. Hariharan and J. A. Pople, *Theor. Chim. Acta* **1973**, *28*, 213-222.
- S11 A. H ollwarth, M. B ohme, S. Dapprich, A. W. Ehlers, A. Gobbi, V. Jonas, K. F. K ohler, R. Stegmann, A. Veldkamp and G. Frenking, *Chem. Phys. Lett.* **1993**, *208*, 237-240.
- S12 a) A. D. Becke, *Phys. Rev. A* **1988**, *38*, 3098-3100; b) J. P. Perdew, *Phys. Rev. B* **1986**, *33*, 8822-8824.
- S13 J. Tomasi, B. Mennucci and R. Cammi, *Chem. Rev.* **2005**, *105*, 2999-3094.
- S14 S. Grimme, S. Ehrlich and L. Goerigk, *J. Comp. Chem.* **2011**, *32*, 1456-1465.

## Cartesian Coordinates and Electronic Energies (in Hartrees)

2DFT

SCF (BP86) Energy = -1781.18571943

Enthalpy 0K = -1780.263562

Enthalpy 298K = -1780.203970

Free Energy 298K = -1780.353799

Lowest Frequency = 10.4822 cm<sup>-1</sup>

Second Frequency = 20.5881 cm<sup>-1</sup>

SCF (BP86-D3BJ) Energy = -

1781.48546681

SCF (C6H6) Energy = -1781.20285752

SCF (BS2) Energy = -3164.95223072

K 2.82093 0.90357 -3.02882  
 Si 1.80325 -0.85651 2.42773  
 Si -0.79441 -2.42300 1.75701  
 Al -0.14758 0.17063 0.13202  
 O 0.24654 -1.45045 2.70610  
 N 1.68381 -0.15897 0.79742  
 N -1.23247 -1.40218 0.38659  
 N -1.03387 1.84812 0.57780  
 N -2.21862 3.60171 -0.45382  
 C 2.87187 0.21410 0.11893  
 C 3.34302 1.58084 0.09242  
 C 4.54901 1.90726 -0.56728  
 H 4.89335 2.94830 -0.54416  
 C 5.34038 0.93747 -1.20172  
 H 6.29864 1.20583 -1.66084  
 C 4.88963 -0.39195 -1.19957  
 H 5.49595 -1.16497 -1.68725  
 C 3.67771 -0.76815 -0.57827  
 C 2.59912 2.71196 0.79835  
 H 1.68055 2.27633 1.22410  
 C 3.44603 3.30662 1.94786  
 H 2.85725 4.05380 2.50780  
 H 4.34833 3.81574 1.56276  
 H 3.77456 2.53019 2.65639  
 C 2.17606 3.83595 -0.17377  
 H 1.62877 4.62249 0.37051  
 H 1.49471 3.46462 -0.95852  
 H 3.05116 4.31088 -0.65628  
 C 3.21918 -2.21647 -0.75331  
 H 2.36918 -2.36587 -0.06820  
 C 2.69339 -2.42720 -2.19173  
 H 2.33171 -3.45940 -2.33834  
 H 3.49737 -2.25608 -2.93570  
 H 1.83798 -1.76324 -2.40782  
 C 4.31079 -3.26426 -0.44817  
 H 3.87794 -4.27934 -0.47177  
 H 4.76414 -3.11072 0.54264  
 H 5.12226 -3.24322 -1.19818  
 C 2.20113 0.38375 3.81137  
 H 3.28980 0.56331 3.85515  
 H 1.89834 -0.04817 4.78118  
 H 1.69702 1.35501 3.69853  
 C 3.09679 -2.23100 2.65355  
 H 4.10683 -1.87995 2.38034  
 H 2.87393 -3.14530 2.08391  
 H 3.12072 -2.49729 3.72496  
 C -2.19534 -2.94321 2.91721  
 H -2.98466 -3.48956 2.37494  
 H -2.65225 -2.08166 3.42696  
 H -1.78433 -3.61957 3.68687

C 0.11757 -4.04101 1.32272  
 H -0.59986 -4.79410 0.95396  
 H 0.58613 -4.45532 2.23259  
 H 0.89761 -3.91683 0.55438  
 C -2.37613 -1.73070 -0.43697  
 C -2.22677 -2.49650 -1.64528  
 C -3.35532 -2.83300 -2.41953  
 H -3.21511 -3.43032 -3.32844  
 C -4.64316 -2.43176 -2.06087  
 H -5.50795 -2.70249 -2.67625  
 C -4.79953 -1.67354 -0.89929  
 H -5.80257 -1.34194 -0.60729  
 C -3.70877 -1.31847 -0.08054  
 C -0.87535 -2.98930 -2.16334  
 H -0.10509 -2.58751 -1.48168  
 C -0.78361 -4.53296 -2.15603  
 H 0.21970 -4.87374 -2.47279  
 H -1.51721 -4.97481 -2.85369  
 H -0.98428 -4.94885 -1.15707  
 C -0.60239 -2.47471 -3.59716  
 H 0.39726 -2.78938 -3.94933  
 H -0.67125 -1.37505 -3.65406  
 H -1.33770 -2.88213 -4.31277  
 C -4.03363 -0.48009 1.15521  
 H -3.09595 -0.36624 1.72076  
 C -5.08599 -1.15168 2.06938  
 H -5.20048 -0.57605 3.00530  
 H -4.81544 -2.18533 2.33471  
 H -6.07810 -1.18066 1.58431  
 C -4.53384 0.92955 0.76551  
 H -4.74625 1.52636 1.67040  
 H -5.47182 0.86475 0.18417  
 H -3.79638 1.48335 0.16521  
 C 0.01395 0.87932 -1.74517  
 H 0.87605 1.57967 -1.70302  
 H 0.12615 0.18864 -2.60391  
 C -1.25042 1.74910 -1.87501  
 H -1.19668 2.48089 -2.70287  
 H -2.12333 1.10288 -2.09519  
 C -1.53073 2.49349 -0.55353  
 C -1.44994 2.47261 1.85955  
 H -2.50435 2.78535 1.72765  
 C -1.36292 1.49919 3.03822  
 H -1.70814 1.99822 3.96086  
 H -0.33143 1.15721 3.21453  
 H -1.98274 0.60279 2.88685  
 C -0.66711 3.76457 2.17853  
 H 0.39057 3.54811 2.41246  
 H -1.10650 4.26538 3.06050  
 H -0.72836 4.45667 1.32560  
 C -2.79731 4.23983 -1.63339  
 H -2.97210 3.53021 -2.47430  
 C -4.16790 4.82575 -1.24158  
 H -4.84196 4.02772 -0.88903  
 H -4.64708 5.33736 -2.09579  
 H -4.04663 5.55029 -0.41765  
 C -1.85997 5.35551 -2.14537  
 H -2.30602 5.90596 -2.99373  
 H -0.89137 4.93844 -2.47505  
 H -1.65476 6.07281 -1.33141

## 2

SCF (BP86) Energy = -3796.07874358

Enthalpy 0K = -3794.099896

Enthalpy 298K = -3793.970297

Free Energy 298K = -3794.278954

Lowest Frequency = 1.9957 cm<sup>-1</sup>Second Frequency = 3.1688 cm<sup>-1</sup>

SCF (BP86-D3BJ) Energy = -

3796.73176868

SCF (C6H6) Energy = -3796.10037484

SCF (BS2) Energy = -6563.66457982

K -0.91431 -0.51186 -1.90410  
 K 6.91793 3.67738 0.14182  
 Si 4.64263 -3.78450 -1.85060  
 Si 5.33322 -3.69851 1.15337  
 Si -6.17159 2.74998 -2.07260  
 Si -6.63448 3.08996 0.97043  
 Al 3.67679 -1.29984 -0.04192  
 Al -5.16365 0.48934 -0.03030  
 O 5.68734 -3.70700 -0.51711  
 O -7.09374 2.88494 -0.66223  
 O 9.27285 4.95407 -0.39306  
 N 3.42326 -2.54149 -1.50531  
 N 4.55264 -2.13499 1.45430  
 N 4.55718 0.46342 -0.42533  
 N 4.39591 2.73163 0.28344  
 N -4.91802 1.57018 -1.65313  
 N -5.77222 1.61569 1.41579  
 N -6.11883 -1.20415 -0.19019  
 N -5.94626 -3.44872 0.49728  
 C 2.24863 -2.53433 -2.32852  
 C 1.12000 -3.38205 -2.03107  
 C 0.01810 -3.42507 -2.91275  
 H -0.81476 -4.10087 -2.68654  
 C -0.02960 -2.64723 -4.07842  
 H -0.88048 -2.71909 -4.76423  
 C 1.03605 -1.77793 -4.34424  
 H 1.00673 -1.15464 -5.24560  
 C 2.16443 -1.70291 -3.49985  
 C 1.03003 -4.22309 -0.75707  
 H 2.02717 -4.19834 -0.28628  
 C 0.63003 -5.69434 -1.01176  
 H 0.71653 -6.27604 -0.07754  
 H 1.26306 -6.17433 -1.77331  
 H -0.42000 -5.77797 -1.34323  
 C 0.02147 -3.59187 0.23067  
 H -0.02000 -4.16747 1.17144  
 H -0.99999 -3.59188 -0.19344  
 H 0.29818 -2.55647 0.48830  
 C 3.26153 -0.70846 -3.88106  
 H 4.07491 -0.83669 -3.14673  
 C 2.74422 0.74565 -3.77707  
 H 3.51697 1.46496 -4.10027  
 H 2.46945 0.99974 -2.73947  
 H 1.86119 0.90137 -4.42312  
 C 3.82791 -0.96944 -5.29504  
 H 4.67592 -0.29249 -5.50249  
 H 3.06878 -0.79035 -6.07721  
 H 4.18460 -2.00544 -5.40601  
 C 5.71103 -3.52210 -3.40394  
 H 5.14045 -3.81196 -4.30326  
 H 6.58611 -4.19268 -3.34099  
 H 6.08107 -2.49674 -3.55086

C 3.96585 -5.54349 -2.06876  
 H 3.22309 -5.58362 -2.88357  
 H 3.50503 -5.94793 -1.15598  
 H 4.80379 -6.20503 -2.35046  
 C 7.00151 -3.96023 2.01011  
 H 6.92542 -3.82321 3.10130  
 H 7.77653 -3.28370 1.61838  
 H 7.32984 -4.99728 1.82246  
 C 4.30359 -5.23886 1.58493  
 H 4.31747 -5.40733 2.67514  
 H 4.75884 -6.12581 1.11084  
 H 3.25110 -5.17516 1.26712  
 C 4.48789 -1.66658 2.82217  
 C 3.35398 -1.94899 3.66109  
 C 3.35729 -1.54930 5.01298  
 H 2.48637 -1.78827 5.63380  
 C 4.43214 -0.86589 5.58335  
 H 4.41622 -0.57483 6.63900  
 C 5.52297 -0.55322 4.77000  
 H 6.36814 -0.00159 5.19903  
 C 5.57444 -0.92773 3.41249  
 C 2.09133 -2.65762 3.16809  
 H 2.23004 -2.87167 2.09385  
 C 1.84303 -3.99344 3.90699  
 H 0.96029 -4.51081 3.49052  
 H 1.64470 -3.82126 4.97972  
 C 0.84903 -1.75067 3.33860  
 H -0.04618 -2.22209 2.89778  
 H 0.99196 -0.76501 2.86699  
 H 0.63005 -1.57321 4.40599  
 C 6.80580 -0.46436 2.63027  
 H 6.72943 -0.89106 1.61680  
 C 8.14378 -0.90976 3.26500  
 H 8.99188 -0.63676 2.61020  
 H 8.18348 -1.99517 3.43436  
 H 8.31011 -0.41468 4.23839  
 C 6.81004 1.07984 2.51306  
 H 7.70238 1.40823 1.93807  
 H 6.87828 1.54432 3.51377  
 H 5.89664 1.45731 2.02259  
 C 1.99672 -0.23585 0.14815  
 H 1.62658 -0.16909 -0.89727  
 H 1.17474 -0.61078 0.77785  
 C 2.45303 1.15528 0.61293  
 H 1.75862 1.96141 0.30732  
 H 2.46499 1.18582 1.72079  
 C 3.87216 1.51670 0.13078  
 C 5.91550 0.72021 -0.92823  
 H 6.49756 1.20117 -0.11195  
 C 5.92656 1.65054 -2.16639  
 H 6.96389 1.94122 -2.43062  
 H 5.31323 2.55045 -1.99857  
 H 5.51531 1.11806 -3.03857  
 C 6.64590 -0.58042 -1.27410  
 H 7.69238 -0.37254 -1.56009  
 H 6.15947 -1.07696 -2.12752  
 H 6.64993 -1.29412 -0.43698  
 C -3.82213 1.41417 -2.54694  
 C -3.81530 0.39943 -3.57221  
 C -2.74885 0.32716 -4.49431  
 H -2.78810 -0.43316 -5.28360  
 C -1.66696 1.21762 -4.45265  
 H -0.87182 1.17169 -5.20511  
 C -1.63536 2.17832 -3.43085

H -0.79267 2.87857 -3.37858  
 C -2.67241 2.28728 -2.47908  
 C -4.94135 -0.62235 -3.71503  
 H -5.68980 -0.38474 -2.94122  
 C -5.62076 -0.55075 -5.10144  
 H -6.48919 -1.23168 -5.13516  
 H -4.93153 -0.85692 -5.90962  
 H -5.97613 0.46651 -5.33021  
 C -4.43388 -2.05830 -3.45003  
 H -5.25336 -2.78609 -3.56741  
 H -4.05685 -2.16780 -2.41934  
 H -3.63130 -2.33779 -4.15879  
 C -2.49710 3.31137 -1.35824  
 H -3.46237 3.36894 -0.82781  
 C -1.43870 2.80886 -0.35108  
 H -1.31681 3.51895 0.48516  
 H -0.45057 2.70342 -0.84100  
 H -1.72977 1.83864 0.08522  
 C -2.10562 4.72082 -1.85289  
 H -2.11450 5.43419 -1.01010  
 H -2.79622 5.09557 -2.62349  
 H -1.08516 4.73602 -2.27765  
 C -7.35818 2.25184 -3.47310  
 H -6.88172 2.42911 -4.45327  
 H -8.25722 2.89079 -3.42210  
 H -7.68459 1.20199 -3.43493  
 C -5.52408 4.45666 -2.60807  
 H -4.83565 4.36993 -3.46642  
 H -5.01141 4.99731 -1.79854  
 H -6.38430 5.06775 -2.93346  
 C -8.24877 3.42584 1.90193  
 H -8.08561 3.46148 2.99172  
 H -9.01140 2.66207 1.68625  
 H -8.64559 4.40624 1.58537  
 C -5.63342 4.70794 1.11024  
 H -5.56387 5.02323 2.16547  
 H -6.15778 5.51017 0.56190  
 H -4.60877 4.62667 0.71315  
 C -5.57691 1.34018 2.82316  
 C -4.38290 1.76048 3.50636  
 C -4.24619 1.55215 4.89369  
 H -3.33190 1.89626 5.39209  
 C -5.23647 0.92041 5.64749  
 H -5.11254 0.77032 6.72564  
 C -6.38260 0.47162 4.98863  
 H -7.16039 -0.04771 5.56032  
 C -6.57780 0.66267 3.60619  
 C -3.19459 2.41261 2.79835  
 H -3.44808 2.47031 1.72528  
 C -2.91041 3.84117 3.31682  
 H -2.08195 4.30775 2.75171  
 H -2.61302 3.82482 4.38074  
 H -3.79171 4.49423 3.22770  
 C -1.92056 1.55077 2.96867  
 H -1.07033 1.98198 2.41033  
 H -2.08146 0.51765 2.62016  
 H -1.61999 1.49528 4.02979  
 C -7.86192 0.08101 3.01536  
 H -7.91216 0.41101 1.96642  
 C -9.13802 0.56135 3.74610  
 H -10.03734 0.21068 3.20876  
 H -9.19211 1.65827 3.82339  
 H -9.19444 0.15070 4.77030  
 C -7.82524 -1.46478 3.03377

H -8.75397 -1.87864 2.60202  
 H -7.74543 -1.83908 4.07102  
 H -6.97983 -1.86985 2.45688  
 C -3.48838 -0.59084 0.20142  
 H -3.20693 -0.82598 -0.84781  
 H -2.60896 -0.17390 0.72423  
 C -3.99522 -1.88419 0.86478  
 H -3.32079 -2.75018 0.71737  
 H -4.05182 -1.73636 1.96196  
 C -5.40814 -2.26132 0.36978  
 C -7.51987 -1.53088 -0.55376  
 H -7.93761 -2.12732 0.28133  
 C -8.36652 -0.27020 -0.74968  
 H -9.41531 -0.54757 -0.95593  
 H -8.00805 0.32289 -1.60619  
 H -8.35575 0.38881 0.13138  
 C -7.62762 -2.42533 -1.80816  
 H -7.31870 -1.87753 -2.71604  
 H -8.67578 -2.74577 -1.95277  
 H -7.00656 -3.32394 -1.68173  
 C -5.21208 -4.53744 1.13559  
 H -4.42007 -4.18303 1.83464  
 C -6.20892 -5.37168 1.96408  
 H -6.68216 -4.74767 2.74016  
 H -5.71019 -6.22615 2.45677  
 H -7.01048 -5.75813 1.31066  
 C -4.53249 -5.41959 0.06474  
 H -4.02480 -6.29219 0.51540  
 H -3.78446 -4.84047 -0.50597  
 H -5.28855 -5.78558 -0.65211  
 C 10.39570 4.99793 0.50938  
 H 10.74390 6.04702 0.60996  
 H 11.23505 4.40846 0.08442  
 C 9.98188 4.44238 1.86596  
 H 9.16136 5.03398 2.30772  
 H 10.83271 4.48536 2.56502  
 H 9.67273 3.38470 1.79563  
 C 9.61009 5.50613 -1.68081  
 H 10.44091 4.92107 -2.12810  
 H 9.97024 6.54782 -1.54996  
 C 8.38469 5.47662 -2.58542  
 H 8.03457 4.44450 -2.76248  
 H 8.63310 5.90842 -3.56843  
 H 7.55933 6.07458 -2.16145  
 C 3.54008 3.78170 0.86899  
 H 2.75899 3.35867 1.53089  
 C 2.83566 4.59506 -0.23738  
 H 2.21439 5.40536 0.18340  
 H 2.18727 3.94858 -0.85129  
 H 3.58380 5.05084 -0.91336  
 C 4.37092 4.72518 1.76574  
 H 3.71575 5.42464 2.31174  
 H 5.06012 5.36267 1.17219  
 H 4.95016 4.15715 2.51542  
 H 2.70402 -4.67493 3.83309

**TS (2<sup>DFT</sup>-A)**

SCF (BP86) Energy = -1781.17139089  
 Enthalpy 0K = -1780.251685  
 Enthalpy 298K = -1780.191412  
 Free Energy 298K = -1780.346158  
 Lowest Frequency = -55.9372 cm<sup>-1</sup>  
 Second Frequency = 14.3051 cm<sup>-1</sup>



SCF (BP86-D3BJ) Energy = -  
 1781.45727263  
 SCF (C6H6) Energy = -1781.18434153  
 SCF (BS2) Energy = -3164.93844155

|    |          |          |          |
|----|----------|----------|----------|
| K  | 2.47820  | 0.00047  | -2.81726 |
| Si | 1.78194  | -0.24849 | 2.41638  |
| Si | -0.84616 | -2.14608 | 1.84278  |
| Al | -0.61552 | 0.17846  | 0.37408  |
| O  | 0.07354  | -0.63999 | 2.04712  |
| N  | 2.26745  | 0.20354  | 0.87011  |
| N  | -1.48327 | -1.54247 | 0.34392  |
| N  | -1.54894 | 1.80615  | 0.71927  |
| N  | -2.57574 | 3.57216  | -0.44391 |
| C  | 3.30172  | 0.50477  | 0.04280  |
| C  | 3.44384  | 1.85240  | -0.50275 |
| C  | 4.40436  | 2.12266  | -1.49374 |
| H  | 4.49083  | 3.14507  | -1.88133 |
| C  | 5.28229  | 1.13268  | -1.98070 |
| H  | 6.04564  | 1.37771  | -2.72702 |
| C  | 5.20547  | -0.15639 | -1.42239 |
| H  | 5.91778  | -0.92398 | -1.75309 |
| C  | 4.24755  | -0.49360 | -0.44549 |
| C  | 2.59479  | 2.98056  | 0.07737  |
| H  | 1.67535  | 2.50973  | 0.46996  |
| C  | 3.33095  | 3.62269  | 1.27856  |
| H  | 2.69710  | 4.38469  | 1.76558  |
| H  | 4.26449  | 4.11283  | 0.94772  |
| H  | 3.59539  | 2.86405  | 2.03273  |
| C  | 2.18824  | 4.06531  | -0.93861 |
| H  | 1.48792  | 4.77774  | -0.47142 |
| H  | 1.68080  | 3.63570  | -1.82141 |
| H  | 3.05454  | 4.65042  | -1.29831 |
| C  | 4.22341  | -1.91088 | 0.11883  |
| H  | 3.28698  | -1.98710 | 0.69874  |
| C  | 4.19193  | -3.00875 | -0.96697 |
| H  | 4.13917  | -4.01137 | -0.50743 |
| H  | 5.09367  | -2.99203 | -1.60553 |
| H  | 3.30788  | -2.91111 | -1.62624 |
| C  | 5.40866  | -2.14355 | 1.08378  |
| H  | 5.34811  | -3.13886 | 1.55952  |
| H  | 5.42534  | -1.38247 | 1.88100  |
| H  | 6.37226  | -2.08273 | 0.54634  |
| C  | 1.69529  | 1.12684  | 3.71877  |
| H  | 2.71681  | 1.40058  | 4.03752  |
| H  | 1.14184  | 0.79930  | 4.61604  |
| H  | 1.21207  | 2.03304  | 3.32336  |
| C  | 2.52756  | -1.74193 | 3.33995  |
| H  | 3.52053  | -1.44573 | 3.72252  |
| H  | 2.66240  | -2.64511 | 2.72771  |
| H  | 1.91023  | -2.00124 | 4.21854  |
| C  | -1.98499 | -2.36034 | 3.33756  |
| H  | -2.66697 | -3.21265 | 3.17177  |
| H  | -2.59346 | -1.46374 | 3.52579  |
| H  | -1.39417 | -2.57909 | 4.24411  |
| C  | 0.24949  | -3.68807 | 1.75164  |
| H  | -0.38470 | -4.53840 | 1.44319  |
| H  | 0.68146  | -3.94057 | 2.73346  |
| H  | 1.06305  | -3.58885 | 1.01655  |
| C  | -2.37932 | -2.09985 | -0.61182 |
| C  | -1.89033 | -2.86700 | -1.72115 |
| C  | -2.79601 | -3.37234 | -2.67397 |
| H  | -2.41246 | -3.96588 | -3.51309 |
| C  | -4.17173 | -3.13988 | -2.57368 |

|   |          |          |          |
|---|----------|----------|----------|
| H | -4.86036 | -3.53926 | -3.32587 |
| C | -4.65200 | -2.39012 | -1.49474 |
| H | -5.72871 | -2.20220 | -1.40731 |
| C | -3.78977 | -1.86814 | -0.51188 |
| C | -0.40419 | -3.17963 | -1.89970 |
| H | 0.13180  | -2.63552 | -1.10161 |
| C | -0.11419 | -4.69036 | -1.74637 |
| H | 0.96959  | -4.89823 | -1.80949 |
| H | -0.61456 | -5.27046 | -2.54203 |
| H | -0.47892 | -5.07402 | -0.78069 |
| C | 0.13548  | -2.69281 | -3.26602 |
| H | 1.23020  | -2.85912 | -3.33425 |
| H | -0.09302 | -1.62445 | -3.43335 |
| H | -0.31852 | -3.24897 | -4.10490 |
| C | -4.39667 | -1.07219 | 0.64240  |
| H | -3.56068 | -0.77404 | 1.29640  |
| C | -5.37364 | -1.93367 | 1.47463  |
| H | -5.74622 | -1.36691 | 2.34631  |
| H | -4.88989 | -2.85355 | 1.84520  |
| H | -6.25203 | -2.23895 | 0.87829  |
| C | -5.08755 | 0.22123  | 0.15594  |
| H | -5.51368 | 0.77584  | 1.01053  |
| H | -5.91383 | -0.00087 | -0.54316 |
| H | -4.37673 | 0.89150  | -0.35415 |
| C | -0.16985 | 0.82853  | -1.46016 |
| H | 0.77008  | 1.41128  | -1.42015 |
| H | -0.11539 | 0.04944  | -2.24367 |
| C | -1.35029 | 1.78403  | -1.74313 |
| H | -1.10004 | 2.55782  | -2.49230 |
| H | -2.19415 | 1.20904  | -2.17280 |
| C | -1.86345 | 2.48046  | -0.46483 |
| C | -2.09196 | 2.44259  | 1.94265  |
| H | -3.09110 | 2.83603  | 1.67100  |
| C | -2.25285 | 1.44657  | 3.09593  |
| H | -2.68273 | 1.95836  | 3.97459  |
| H | -1.29038 | 1.00243  | 3.39895  |
| H | -2.93870 | 0.62872  | 2.81633  |
| C | -1.24542 | 3.66106  | 2.36177  |
| H | -0.21378 | 3.36052  | 2.61583  |
| H | -1.68521 | 4.15691  | 3.24603  |
| H | -1.21572 | 4.38809  | 1.53624  |
| C | -2.96766 | 4.24647  | -1.67880 |
| H | -2.91034 | 3.58871  | -2.57591 |
| C | -4.43504 | 4.69672  | -1.53750 |
| H | -5.09349 | 3.82724  | -1.37426 |
| H | -4.78003 | 5.23209  | -2.44030 |
| H | -4.54165 | 5.36643  | -0.66663 |
| C | -2.04693 | 5.46050  | -1.92494 |
| H | -2.36021 | 6.03263  | -2.81696 |
| H | -1.00017 | 5.14004  | -2.06840 |
| H | -2.07414 | 6.13340  | -1.05007 |

**A**  
 SCF (BP86) Energy = -1781.18000056  
 Enthalpy 0K = -1780.260696  
 Enthalpy 298K = -1780.199131  
 Free Energy 298K = -1780.359815  
 Lowest Frequency = 8.9634 cm<sup>-1</sup>  
 Second Frequency = 10.1451 cm<sup>-1</sup>  
 SCF (BP86-D3BJ) Energy = -  
 1781.46195808  
 SCF (C6H6) Energy = -1781.19128436  
 SCF (BS2) Energy = -3164.94739985

K 2.01650 -0.09131 -2.00772  
 Si 1.86121 0.36904 1.86224  
 Si -0.37797 -1.94904 1.34349  
 Al -1.13629 0.38719 0.16144  
 O 0.22559 -0.27556 1.38645  
 N 2.78348 0.19700 0.46857  
 N -1.57573 -1.46833 0.16395  
 N -2.21831 1.81975 0.72342  
 N -3.54908 3.50708 -0.22429  
 C 4.07629 0.41785 0.01574  
 C 4.45349 1.66639 -0.61655  
 C 5.72212 1.81025 -1.20962  
 H 5.98677 2.77134 -1.66939  
 C 6.66022 0.76999 -1.21408  
 H 7.64384 0.90447 -1.67605  
 C 6.31445 -0.44303 -0.60182  
 H 7.04429 -1.26299 -0.58929  
 C 5.06144 -0.64209 0.00294  
 C 3.50039 2.86207 -0.60606  
 H 2.54258 2.49092 -0.19527  
 C 4.01173 3.97833 0.33341  
 H 3.28586 4.80844 0.40065  
 H 4.96895 4.39263 -0.03094  
 H 4.18601 3.59010 1.35027  
 C 3.23298 3.44452 -2.01313  
 H 2.50088 4.26987 -1.96697  
 H 2.83238 2.68990 -2.71891  
 H 4.15462 3.84362 -2.47210  
 C 4.75317 -1.98871 0.65283  
 H 3.70799 -1.92091 1.00317  
 C 4.84464 -3.16025 -0.35031  
 H 4.56716 -4.11665 0.12817  
 H 5.86730 -3.27453 -0.75208  
 H 4.17083 -3.01050 -1.21463  
 C 5.65656 -2.25436 1.87767  
 H 5.38783 -3.20594 2.37156  
 H 5.56622 -1.44488 2.62101  
 H 6.72011 -2.31904 1.58533  
 C 1.41703 2.11332 2.46544  
 H 2.33782 2.66464 2.72381  
 H 0.77901 2.07902 3.36505  
 H 0.88660 2.69189 1.69116  
 C 2.32668 -0.65473 3.40025  
 H 3.27462 -0.25943 3.80711  
 H 2.49431 -1.72075 3.17581  
 H 1.56568 -0.57270 4.19533  
 C -0.96073 -2.45571 3.06764  
 H -1.52649 -3.40197 3.00683  
 H -1.61604 -1.69383 3.51620  
 H -0.10121 -2.62062 3.73898  
 C 0.93764 -3.18693 0.78368  
 H 0.45069 -4.15787 0.58215  
 H 1.68997 -3.34982 1.57260  
 H 1.46489 -2.86977 -0.12812  
 C -2.49016 -2.27061 -0.58690  
 C -2.12716 -2.78156 -1.87586  
 C -3.05303 -3.54766 -2.61004  
 H -2.76438 -3.93457 -3.59477  
 C -4.33057 -3.82452 -2.11396  
 H -5.03852 -4.41919 -2.70065  
 C -4.68831 -3.32747 -0.85667  
 H -5.68926 -3.53548 -0.46158  
 C -3.79680 -2.56245 -0.08086  
 C -0.75693 -2.52151 -2.50311

H -0.20217 -1.91130 -1.76462  
 C 0.02869 -3.82999 -2.74787  
 H 1.03631 -3.62463 -3.15730  
 H -0.49208 -4.47351 -3.47779  
 H 0.14971 -4.41102 -1.82010  
 C -0.87876 -1.71951 -3.82001  
 H 0.11732 -1.49221 -4.25167  
 H -1.42278 -0.77217 -3.67323  
 H -1.42452 -2.29704 -4.58590  
 C -4.26977 -2.04058 1.27330  
 H -3.38697 -1.60422 1.76862  
 C -4.81466 -3.16161 2.18488  
 H -5.06084 -2.75982 3.18341  
 H -4.07923 -3.97423 2.31399  
 H -5.73722 -3.61128 1.77713  
 C -5.31331 -0.91306 1.10060  
 H -5.63741 -0.52514 2.08261  
 H -6.21022 -1.28105 0.57112  
 H -4.90029 -0.07036 0.52176  
 C -0.67214 1.35778 -1.52001  
 H 0.18399 2.04205 -1.35012  
 H -0.48558 0.79750 -2.45556  
 C -1.95875 2.20976 -1.70330  
 H -1.76055 3.13531 -2.27281  
 H -2.69396 1.64006 -2.30538  
 C -2.63877 2.59035 -0.36811  
 C -2.82151 2.17519 2.02870  
 H -3.90793 2.31253 1.85959  
 C -2.60329 1.05933 3.05618  
 H -3.06799 1.33201 4.01912  
 H -1.52671 0.89262 3.24095  
 H -3.05267 0.10957 2.72260  
 C -2.27303 3.51416 2.56276  
 H -1.19002 3.44373 2.76262  
 H -2.78001 3.78420 3.50652  
 H -2.45835 4.31302 1.83039  
 C -4.02104 4.28684 -1.36742  
 H -3.78620 3.81269 -2.34714  
 C -5.55472 4.40185 -1.27027  
 H -6.02235 3.40330 -1.29548  
 H -5.96497 5.00066 -2.10286  
 H -5.83728 4.88103 -0.31707  
 C -3.36463 5.68320 -1.35004  
 H -3.74662 6.31804 -2.16948  
 H -2.26819 5.60696 -1.45375  
 H -3.57679 6.18570 -0.39029

**TS (A-B)**

SCF (BP86) Energy = -1781.15876993  
 Enthalpy 0K = -1780.237816  
 Enthalpy 298K = -1780.178234  
 Free Energy 298K = -1780.330603  
 Lowest Frequency = -96.6549 cm<sup>-1</sup>  
 Second Frequency = 10.9651 cm<sup>-1</sup>  
 SCF (BP86-D3BJ) Energy = -  
 1781.44926941  
 SCF (C6H6) Energy = -1781.16975097  
 SCF (BS2) Energy = -3164.92234120

K 1.93811 -0.12386 2.19753  
 Si 1.29403 -1.84766 -1.20172  
 Si 0.69131 1.01588 -0.79075  
 Al -1.61031 -0.45299 -0.03491  
 O -0.02398 -0.71079 -1.05220

N 2.40290 -0.77141 -0.43264  
 N -0.85046 1.29017 0.09695  
 N -3.18508 -1.05078 -0.87671  
 N -5.20018 -2.14888 -0.39370  
 C 3.77237 -0.77291 -0.11824  
 C 4.31416 -1.60010 0.94505  
 C 5.63897 -1.41677 1.38908  
 H 6.02467 -2.05709 2.19150  
 C 6.48338 -0.46056 0.81580  
 H 7.50604 -0.32449 1.18213  
 C 6.00531 0.28181 -0.27086  
 H 6.67827 0.98784 -0.77030  
 C 4.69538 0.13569 -0.76125  
 C 3.52385 -2.77940 1.52163  
 H 2.46047 -2.63507 1.25394  
 C 3.97098 -4.09617 0.84039  
 H 3.36174 -4.95249 1.18069  
 H 5.02820 -4.30901 1.07709  
 H 3.88723 -4.02397 -0.25615  
 C 3.62308 -2.94469 3.05692  
 H 2.94419 -3.74204 3.40583  
 H 3.37629 -2.02409 3.62244  
 H 4.64224 -3.22618 3.37144  
 C 4.31104 0.86015 -2.04943  
 H 3.21252 0.87673 -2.08566  
 C 4.81643 2.31444 -2.14363  
 H 4.40323 2.80178 -3.04390  
 H 5.91650 2.36656 -2.22890  
 H 4.51931 2.91307 -1.26630  
 C 4.80286 0.04679 -3.27202  
 H 4.48055 0.52073 -4.21679  
 H 4.41154 -0.98362 -3.25350  
 H 5.90593 -0.01358 -3.28231  
 C 0.67759 -3.46548 -0.41158  
 H 1.41600 -4.27621 -0.52761  
 H -0.24369 -3.77880 -0.93399  
 H 0.43260 -3.36970 0.65843  
 C 1.60746 -2.24548 -3.02893  
 H 2.46006 -2.94151 -3.12179  
 H 1.84109 -1.34700 -3.62022  
 H 0.72618 -2.73708 -3.47563  
 C 0.79931 1.49203 -2.63502  
 H 1.12830 2.53554 -2.76461  
 H -0.18957 1.37589 -3.10552  
 H 1.49904 0.84634 -3.18774  
 C 1.90830 2.19062 0.16414  
 H 1.91166 3.14764 -0.38730  
 H 2.95123 1.83726 0.20767  
 H 1.53537 2.44338 1.17358  
 C -1.23745 2.50961 0.73134  
 C -1.21175 2.65989 2.16082  
 C -1.56049 3.88892 2.75427  
 H -1.53579 3.97880 3.84711  
 C -1.94412 4.99259 1.98876  
 H -2.20533 5.94240 2.46672  
 C -2.00848 4.84718 0.60026  
 H -2.33683 5.69500 -0.01229  
 C -1.67917 3.63801 -0.04063  
 C -0.85136 1.51332 3.10380  
 H -0.58506 0.65445 2.45972  
 C 0.33249 1.86896 4.03843  
 H 0.63959 1.00176 4.65775  
 H 0.04943 2.66354 4.74894  
 H 1.20848 2.26253 3.48783

C -2.06594 1.07300 3.95212  
 H -1.81331 0.21627 4.60325  
 H -2.90866 0.77509 3.30852  
 H -2.41284 1.89752 4.59900  
 C -1.86634 3.57334 -1.55523  
 H -1.55411 2.56834 -1.87810  
 C -1.00075 4.61354 -2.30064  
 H -1.09238 4.48613 -3.39366  
 H 0.06604 4.52403 -2.03406  
 H -1.31404 5.64528 -2.06076  
 C -3.35635 3.74277 -1.93466  
 H -3.49635 3.63552 -3.02500  
 H -3.73286 4.74026 -1.64592  
 H -3.98693 2.99061 -1.43182  
 C -1.98193 -1.60892 1.54583  
 H -1.54336 -2.60963 1.36442  
 H -1.67194 -1.30957 2.56227  
 C -3.52802 -1.72927 1.46816  
 H -3.89631 -2.65140 1.95264  
 H -3.99808 -0.89286 2.02443  
 C -4.05623 -1.68353 0.01691  
 C -3.62518 -1.01863 -2.28664  
 H -4.71306 -0.81143 -2.28417  
 C -2.89518 0.08053 -3.06434  
 H -3.25041 0.11385 -4.10891  
 H -1.80732 -0.11257 -3.08944  
 H -3.06627 1.07143 -2.61406  
 C -3.42505 -2.39223 -2.95879  
 H -2.35180 -2.65565 -2.99242  
 H -3.80725 -2.38088 -3.99560  
 H -3.97157 -3.16441 -2.39683  
 C -6.14556 -2.76362 0.53463  
 H -5.93052 -2.52653 1.60112  
 C -7.55295 -2.21881 0.22021  
 H -7.58272 -1.12341 0.34610  
 H -8.31451 -2.66745 0.88306  
 H -7.81915 -2.44335 -0.82720  
 C -6.10451 -4.29786 0.37561  
 H -6.85705 -4.79148 1.01668  
 H -5.10932 -4.69502 0.64102  
 H -6.30590 -4.57076 -0.67509

**B**

SCF (BP86) Energy = -1781.19877995  
 Enthalpy 0K = -1780.276258  
 Enthalpy 298K = -1780.216639  
 Free Energy 298K = -1780.366591  
 Lowest Frequency = 15.5986 cm<sup>-1</sup>  
 Second Frequency = 21.3976 cm<sup>-1</sup>  
 SCF (BP86-D3BJ) Energy = -  
 1781.47702315  
 SCF (C6H6) Energy = -1781.18425767  
 SCF (BS2) Energy = -3164.93679883

K 0.37738 1.00517 2.83549  
 Si 1.50453 -1.85134 1.11059  
 Si 1.21818 0.15636 -1.26349  
 Al -1.36475 -0.38121 0.65599  
 O -0.01147 -1.25731 1.50084  
 N 2.25800 -0.59261 0.05862  
 N -0.34865 0.69320 -0.59123  
 N -2.91786 -1.42319 0.33619  
 N -5.22107 -1.44843 0.78671  
 C 3.70420 -0.44319 0.06764

C 4.31530 0.60954 0.82986  
 C 5.71766 0.69848 0.91938  
 H 6.16378 1.49950 1.51975  
 C 6.55424 -0.20430 0.25927  
 H 7.64293 -0.12011 0.33983  
 C 5.97025 -1.20824 -0.51404  
 H 6.61482 -1.91355 -1.05040  
 C 4.57170 -1.35112 -0.62611  
 C 3.50963 1.67701 1.57077  
 H 2.46418 1.55662 1.23076  
 C 3.58609 1.49377 3.10682  
 H 2.99770 2.26916 3.63871  
 H 4.62700 1.60361 3.45614  
 H 3.25684 0.49138 3.42838  
 C 3.96336 3.10981 1.21450  
 H 3.31134 3.85709 1.70017  
 H 3.93933 3.28649 0.12780  
 H 4.99298 3.30383 1.56077  
 C 4.07228 -2.48783 -1.51829  
 H 2.97473 -2.51390 -1.44153  
 C 4.44717 -2.23640 -2.99864  
 H 4.01961 -3.02004 -3.64879  
 H 5.54285 -2.24915 -3.13682  
 H 4.08341 -1.25811 -3.35472  
 C 4.61809 -3.86483 -1.07320  
 H 4.14157 -4.67492 -1.65223  
 H 4.43523 -4.05420 -0.00249  
 H 5.70744 -3.94036 -1.23776  
 C 2.52068 -2.07596 2.71020  
 H 3.60617 -2.05465 2.51853  
 H 2.27119 -3.06078 3.14189  
 H 2.30239 -1.32555 3.49039  
 C 1.35521 -3.59621 0.37558  
 H 2.31097 -4.13990 0.44809  
 H 1.03443 -3.61488 -0.67690  
 H 0.60580 -4.15118 0.96633  
 C 0.95634 -1.12677 -2.64734  
 H 1.91358 -1.47780 -3.06223  
 H 0.38973 -0.66527 -3.47208  
 H 0.38317 -2.00541 -2.31017  
 C 2.21646 1.57200 -2.03713  
 H 3.08634 1.16703 -2.58089  
 H 2.58878 2.29406 -1.29568  
 H 1.58620 2.11614 -2.76094  
 C -1.10501 1.79734 -1.15018  
 C -0.92986 3.13931 -0.66156  
 C -1.80825 4.16371 -1.06605  
 H -1.66871 5.17332 -0.66134  
 C -2.84596 3.93164 -1.97110  
 H -3.52561 4.73847 -2.26458  
 C -2.97600 2.65181 -2.51320  
 H -3.75799 2.46194 -3.25689  
 C -2.12950 1.58860 -2.13887  
 C 0.21706 3.55766 0.26075  
 H 0.84028 2.65870 0.42533  
 C 1.09519 4.64047 -0.41154  
 H 1.94686 4.92234 0.23072  
 H 0.50848 5.55549 -0.60196  
 H 1.49083 4.29514 -1.37917  
 C -0.26956 4.09138 1.63070  
 H 0.58382 4.30593 2.30381  
 H -0.96949 3.39773 2.13020  
 H -0.82258 5.03880 1.51022  
 C -2.31804 0.26741 -2.88489

H -1.66772 -0.47782 -2.39968  
 C -1.86680 0.42545 -4.35853  
 H -1.89557 -0.54579 -4.88423  
 H -0.84424 0.83267 -4.43908  
 H -2.53529 1.11826 -4.90039  
 C -3.76629 -0.26687 -2.84140  
 H -3.82878 -1.23527 -3.36919  
 H -4.46882 0.41961 -3.34671  
 H -4.11440 -0.42285 -1.80909  
 C -2.41274 0.77302 1.93994  
 H -2.41057 0.33829 2.96555  
 H -2.21111 1.85689 2.04292  
 C -3.84399 0.60291 1.36358  
 H -4.62387 0.85048 2.10457  
 H -3.98094 1.31155 0.52285  
 C -4.07855 -0.82193 0.82946  
 C -3.08393 -2.81350 -0.13754  
 H -4.09318 -2.88101 -0.58673  
 C -2.03812 -3.17620 -1.19573  
 H -2.14906 -4.23098 -1.50279  
 H -1.01616 -3.05914 -0.79602  
 H -2.13562 -2.54838 -2.09589  
 C -3.04836 -3.79752 1.04957  
 H -2.07026 -3.75456 1.56170  
 H -3.22061 -4.83564 0.71094  
 H -3.84016 -3.53431 1.76823  
 C -6.45420 -0.81975 1.25170  
 H -6.38999 0.29110 1.29740  
 C -7.57876 -1.17068 0.25762  
 H -7.33531 -0.79601 -0.75070  
 H -8.54327 -0.73179 0.57040  
 H -7.69424 -2.26639 0.18956  
 C -6.79736 -1.33098 2.66689  
 H -7.76603 -0.93215 3.01885  
 H -6.01780 -1.03714 3.39134  
 H -6.85254 -2.43371 2.66224

**TS (B-C)**

SCF (BP86) Energy = -1781.17009116  
 Enthalpy 0K = -1780.247204  
 Enthalpy 298K = -1780.188518  
 Free Energy 298K = -1780.336329  
 Lowest Frequency = -20.4839 cm<sup>-1</sup>  
 Second Frequency = 10.2955 cm<sup>-1</sup>  
 SCF (BP86-D3BJ) Energy = -  
 1781.46946752  
 SCF (C6H6) Energy = -1781.17985494  
 SCF (BS2) Energy = -3164.93445088

K 0.48613 -0.27744 2.35563  
 Si 1.38907 -2.28014 -0.48298  
 Si 1.21491 0.69634 -0.79392  
 Al -1.47176 -0.76154 -0.16908  
 O -0.11123 -1.69840 -0.89777  
 N 2.23305 -0.72778 -0.08626  
 N -0.44198 0.89818 -0.02511  
 N -3.15895 -1.01436 -0.97916  
 N -5.39600 -1.52484 -0.49293  
 C 3.67494 -0.62136 0.13518  
 C 4.23166 -0.76301 1.45437  
 C 5.59365 -0.49658 1.69500  
 H 5.97773 -0.58561 2.71750  
 C 6.46409 -0.13009 0.66882  
 H 7.51605 0.09265 0.87417

C 5.96318 -0.10034 -0.63226  
 H 6.64400 0.12310 -1.46102  
 C 4.61006 -0.36398 -0.92936  
 C 3.42777 -1.22764 2.66773  
 H 2.46608 -1.59137 2.27677  
 C 4.06441 -2.44673 3.37506  
 H 3.40342 -2.82004 4.17777  
 H 5.03284 -2.19251 3.83749  
 H 4.24138 -3.27040 2.66463  
 C 3.21960 -0.07927 3.68731  
 H 2.55593 -0.37621 4.52343  
 H 2.83384 0.84456 3.21741  
 H 4.18470 0.20227 4.14070  
 C 4.26562 -0.41341 -2.41890  
 H 3.19745 -0.64537 -2.50718  
 C 4.53567 0.92536 -3.14394  
 H 4.21323 0.86489 -4.19825  
 H 5.61272 1.16927 -3.14474  
 H 4.00684 1.76929 -2.67235  
 C 5.04664 -1.54698 -3.12857  
 H 4.71840 -1.63864 -4.17906  
 H 4.89262 -2.52047 -2.63672  
 H 6.13201 -1.34469 -3.13669  
 C 1.29224 -3.49605 0.98922  
 H 2.28944 -3.81436 1.33792  
 H 0.76581 -4.39886 0.63212  
 H 0.71924 -3.13345 1.86098  
 C 2.14200 -3.29104 -1.89497  
 H 3.15206 -3.65469 -1.64206  
 H 2.20160 -2.73032 -2.84026  
 H 1.50128 -4.17348 -2.06675  
 C 1.11955 0.48812 -2.69598  
 H 1.88315 1.09370 -3.20820  
 H 0.13987 0.79104 -3.08622  
 H 1.25224 -0.56495 -2.98365  
 C 2.25617 2.20634 -0.26838  
 H 3.31965 2.05159 -0.50872  
 H 2.18107 2.36894 0.82198  
 H 1.91485 3.13534 -0.74762  
 C -0.82422 2.25499 0.32424  
 C -1.19682 2.64310 1.66472  
 C -1.19268 4.00409 2.03573  
 H -1.43443 4.26655 3.07251  
 C -0.93141 5.02467 1.11922  
 H -0.89932 6.07268 1.43391  
 C -0.81831 4.66818 -0.22632  
 H -0.75729 5.45417 -0.98796  
 C -0.81684 3.32335 -0.64531  
 C -1.79194 1.68439 2.70203  
 H -1.76775 0.66178 2.29018  
 C -1.09531 1.72597 4.08827  
 H -1.44181 0.90026 4.73738  
 H -1.33740 2.66346 4.61636  
 H 0.01063 1.70482 4.03844  
 C -3.29878 1.99500 2.89523  
 H -3.76113 1.28069 3.59982  
 H -3.83791 1.93486 1.93651  
 H -3.44156 3.01268 3.29749  
 C -0.98762 3.07742 -2.14586  
 H -0.94082 1.99188 -2.30117  
 C 0.07051 3.75412 -3.04253  
 H -0.10360 3.49785 -4.10224  
 H 1.09633 3.44432 -2.78620  
 H 0.02346 4.85464 -2.96213

C -2.40665 3.53044 -2.57355  
 H -2.58463 3.29275 -3.63762  
 H -2.53385 4.61977 -2.44453  
 H -3.18466 3.02847 -1.97485  
 C -2.17962 -1.63372 1.52041  
 H -1.96314 -2.71017 1.35705  
 H -1.89149 -1.44112 2.57582  
 C -3.70961 -1.41750 1.38976  
 H -4.28176 -2.21840 1.89227  
 H -4.00291 -0.47958 1.89951  
 C -4.17664 -1.33100 -0.07779  
 C -3.53831 -1.07506 -2.40787  
 H -4.54495 -0.62374 -2.49888  
 C -2.54619 -0.29499 -3.27345  
 H -2.84460 -0.33850 -4.33538  
 H -1.53202 -0.72698 -3.19710  
 H -2.50613 0.76555 -2.97657  
 C -3.64226 -2.53872 -2.88375  
 H -2.66031 -3.03924 -2.80983  
 H -3.97681 -2.58471 -3.93614  
 H -4.37418 -3.08080 -2.26618  
 C -6.47448 -1.82169 0.44560  
 H -6.23029 -1.54614 1.49701  
 C -7.71107 -0.99819 0.03417  
 H -7.48744 0.08148 0.06692  
 H -8.56823 -1.19824 0.70206  
 H -8.00292 -1.24823 -1.00054  
 C -6.79045 -3.33216 0.41682  
 H -7.64786 -3.57973 1.06860  
 H -5.91999 -3.92378 0.74998  
 H -7.03253 -3.64347 -0.61438

**C**

SCF (BP86) Energy = -1781.19878031  
 Enthalpy 0K = -1780.276261  
 Enthalpy 298K = -1780.216641  
 Free Energy 298K = -1780.366591  
 Lowest Frequency = 15.5763 cm<sup>-1</sup>  
 Second Frequency = 21.4724 cm<sup>-1</sup>  
 SCF (BP86-D3BJ) Energy = -  
 1781.50496745  
 SCF (C6H6) Energy = -1781.21088821  
 SCF (BS2) Energy = -3164.96271581

K -0.37596 1.00072 -2.84220  
 Si -1.50489 -1.85108 -1.10936  
 Si -1.21835 0.15648 1.26481  
 Al 1.36396 -0.38081 -0.65551  
 O 0.01096 -1.25720 -1.50073  
 N -2.25804 -0.59234 -0.05746  
 N 0.34866 0.69266 0.59278  
 N 2.91705 -1.42304 -0.33597  
 N 5.22021 -1.44851 -0.78686  
 C -3.70411 -0.44211 -0.06764  
 C -4.31415 0.61036 -0.83106  
 C -5.71641 0.70001 -0.92138  
 H -6.16178 1.50087 -1.52254  
 C -6.55385 -0.20184 -0.26108  
 H -7.64245 -0.11708 -0.34227  
 C -5.97086 -1.20563 0.51321  
 H -6.61613 -1.91025 1.04965  
 C -4.57246 -1.34917 0.62614  
 C -3.50750 1.67698 -1.57213  
 H -2.46191 1.55497 -1.23302

C -3.58540 1.49485 -3.10824  
 H -2.99614 2.26967 -3.64000  
 H -4.62635 1.60659 -3.45683  
 H -3.25799 0.49216 -3.43073  
 C -3.95926 3.11016 -1.21483  
 H -3.30687 3.85696 -1.70076  
 H -3.93408 3.28635 -0.12809  
 H -4.98903 3.30535 -1.56005  
 C -4.07393 -2.48564 1.51912  
 H -2.97636 -2.51218 1.44284  
 C -4.44935 -2.23334 2.99919  
 H -4.02254 -3.01694 3.64987  
 H -5.54510 -2.24537 3.13689  
 H -4.08514 -1.25511 3.35498  
 C -4.62005 -3.86264 1.07441  
 H -4.14433 -4.67262 1.65424  
 H -4.43645 -4.05269 0.00395  
 H -5.70956 -3.93759 1.23819  
 C -2.52140 -2.07684 -2.70852  
 H -3.60674 -2.06212 -2.51541  
 H -2.26686 -3.05921 -3.14285  
 H -2.30882 -1.32317 -3.48712  
 C -1.35573 -3.59577 -0.37383  
 H -2.31160 -4.13926 -0.44648  
 H -1.03540 -3.61414 0.67879  
 H -0.60623 -4.15114 -0.96408  
 C -0.95711 -1.12672 2.64876  
 H -0.39041 -0.66541 3.47354  
 H -0.38421 -2.00557 2.31167  
 H -1.91452 -1.47741 3.06355  
 C -2.21636 1.57240 2.03826  
 H -3.08650 1.16773 2.58183  
 H -2.58823 2.29461 1.29675  
 H -1.58606 2.11628 2.76224  
 C 1.10566 1.79661 1.15117  
 C 0.93111 3.13843 0.66199  
 C 1.81033 4.16244 1.06566  
 H 1.67128 5.17195 0.66052  
 C 2.84817 3.93013 1.97050  
 H 3.52846 4.73666 2.26336  
 C 2.97753 2.65051 2.51328  
 H 3.75960 2.46052 3.25685  
 C 2.13027 1.58765 2.13966  
 C -0.21630 3.55702 -0.25959  
 H -0.83988 2.65825 -0.42371  
 C -1.09329 4.64033 0.41341  
 H -1.94580 4.92209 -0.22777  
 H -0.50613 5.55532 0.60260  
 H -1.48766 4.29552 1.38176  
 C 0.26918 4.09030 -1.63007  
 H -0.58488 4.30564 -2.30205  
 H 0.96760 3.39577 -2.13044  
 H 0.82341 5.03712 -1.51038  
 C 2.31810 0.26659 2.88608  
 H 1.66735 -0.47839 2.40104  
 C 1.86691 0.42529 4.35965  
 H 1.89537 -0.54576 4.88570  
 H 0.84447 0.83284 4.44003  
 H 2.53560 1.11810 4.90127  
 C 3.76606 -0.26848 2.84269  
 H 3.82804 -1.23682 3.37065  
 H 4.46896 0.41770 3.34790  
 H 4.11409 -0.42479 1.81040  
 C 2.41217 0.77372 -1.93913

H 2.41044 0.33939 -2.96495  
 H 2.21051 1.85762 -2.04169  
 C 3.84334 0.60325 -1.36265  
 H 4.62331 0.85117 -2.10342  
 H 3.98016 1.31149 -0.52156  
 C 4.07776 -0.82182 -0.82917  
 C 3.08295 -2.81353 0.13725  
 H 4.09234 -2.88144 0.58607  
 C 2.03742 -3.17630 1.19570  
 H 2.14808 -4.23125 1.50229  
 H 1.01536 -3.05866 0.79646  
 H 2.13551 -2.54887 2.09607  
 C 3.04675 -3.79718 -1.05016  
 H 2.06848 -3.75384 -1.56194  
 H 3.21889 -4.83545 -0.71192  
 H 3.83837 -3.53392 -1.76900  
 C 6.45331 -0.81975 -1.25186  
 H 6.38947 0.29117 -1.29618  
 C 7.57831 -1.17228 -0.25886  
 H 7.33555 -0.79876 0.75005  
 H 8.54280 -0.73333 -0.57163  
 H 7.69346 -2.26810 -0.19220  
 C 6.79548 -1.32941 -2.66786  
 H 7.76412 -0.93057 -3.01989  
 H 6.01564 -1.03437 -3.39153  
 H 6.85019 -2.43217 -2.66458

**TS (C-3<sup>DFT</sup>)**

SCF (BP86) Energy = -1781.19747465  
 Enthalpy 0K = -1780.275127  
 Enthalpy 298K = -1780.216434  
 Free Energy 298K = -1780.363023  
 Lowest Frequency = -12.3144 cm<sup>-1</sup>  
 Second Frequency = 17.9933 cm<sup>-1</sup>  
 SCF (BP86-D3BJ) Energy = -  
 1781.50010629  
 SCF (C6H6) Energy = -1781.21302035  
 SCF (BS2) Energy = -3164.96222652

K -0.31681 -0.51091 -3.54114  
 Si -1.70826 -1.99999 -0.65027  
 Si -1.23990 0.34553 1.33518  
 Al 1.17927 -0.54897 -0.63697  
 O -0.16986 -1.63586 -1.21971  
 N -2.32084 -0.50895 0.12257  
 N 0.36300 0.65175 0.61869  
 N 2.80009 -1.49306 -0.30329  
 N 5.11584 -1.28371 -0.62958  
 C -3.70936 -0.14673 -0.07389  
 C -4.08028 0.77729 -1.10619  
 C -5.43927 1.07857 -1.32279  
 H -5.70900 1.78599 -2.11584  
 C -6.45124 0.50558 -0.54819  
 H -7.50185 0.75526 -0.72969  
 C -6.09545 -0.38850 0.46434  
 H -6.88072 -0.84160 1.08028  
 C -4.75207 -0.73195 0.71609  
 C -3.05698 1.48998 -1.99289  
 H -2.05620 1.18536 -1.63119  
 C -3.20715 1.11014 -3.48750  
 H -2.43920 1.61656 -4.10662  
 H -4.18474 1.43761 -3.88106  
 H -3.16426 0.01934 -3.65809  
 C -3.17354 3.02552 -1.87132

H -2.37378 3.52884 -2.44230  
H -3.10268 3.35397 -0.82383  
H -4.14076 3.38211 -2.26670  
C -4.48230 -1.73381 1.83917  
H -3.39940 -1.93353 1.84677  
C -4.87071 -1.15542 3.21969  
H -4.62521 -1.86986 4.02533  
H -5.95418 -0.94852 3.27551  
H -4.34231 -0.21027 3.42864  
C -5.21058 -3.07733 1.60434  
H -4.92779 -3.81134 2.37920  
H -4.96641 -3.50914 0.61864  
H -6.30762 -2.95824 1.64758  
C -2.82439 -2.49950 -2.11782  
H -3.84714 -2.70725 -1.76120  
H -2.43287 -3.43274 -2.56123  
H -2.93151 -1.74884 -2.91919  
C -1.66863 -3.54916 0.44680  
H -2.68963 -3.92592 0.62404  
H -1.19514 -3.37953 1.42517  
H -1.10201 -4.34321 -0.06988  
C -1.10359 -0.76202 2.88259  
H -0.56918 -0.21957 3.67868  
H -0.54238 -1.69127 2.69123  
H -2.09609 -1.03226 3.27737  
C -2.14236 1.91620 1.89276  
H -3.02886 1.64943 2.49226  
H -2.47890 2.53949 1.05153  
H -1.47261 2.52158 2.52645  
C 1.22909 1.71438 1.10608  
C 1.19617 3.02813 0.51878  
C 2.15263 3.99350 0.89348  
H 2.12035 4.98041 0.41722  
C 3.13294 3.73445 1.85268  
H 3.87220 4.49683 2.12053  
C 3.13232 2.48611 2.47599  
H 3.87419 2.27443 3.25414  
C 2.20495 1.48006 2.13770  
C 0.13846 3.49066 -0.48634  
H -0.53938 2.63746 -0.66499  
C -0.67660 4.67561 0.08882  
H -1.45809 5.00170 -0.61931  
H -0.02232 5.54494 0.27519  
H -1.16010 4.41836 1.04407  
C 0.75019 3.92280 -1.83942  
H -0.04399 4.18512 -2.56350  
H 1.37899 3.13249 -2.27871  
H 1.38681 4.81728 -1.72121  
C 2.28044 0.19173 2.95611  
H 1.55627 -0.51449 2.51942  
C 1.88008 0.46350 4.42765  
H 1.81401 -0.48042 4.99779  
H 0.91167 0.98586 4.50865  
H 2.63279 1.10081 4.92531  
C 3.67881 -0.46490 2.92099  
H 3.65788 -1.43653 3.44629  
H 4.42804 0.16256 3.43646  
H 4.03006 -0.63652 1.89213  
C 2.12456 0.34585 -2.19261  
H 2.25507 -0.34722 -3.05745  
H 1.81099 1.32441 -2.60406  
C 3.53464 0.47953 -1.55277  
H 4.31329 0.70873 -2.30155  
H 3.53816 1.32360 -0.83515

C 3.91007 -0.81787 -0.80658  
C 3.07211 -2.81506 0.29619  
H 4.01369 -2.73431 0.87310  
C 1.93694 -3.24960 1.22779  
H 2.15203 -4.24224 1.66073  
H 0.98798 -3.32726 0.67155  
H 1.79971 -2.54072 2.06106  
C 3.30663 -3.87090 -0.80493  
H 2.39460 -4.00028 -1.41636  
H 3.56850 -4.85006 -0.36389  
H 4.13750 -3.55197 -1.45286  
C 6.28579 -0.56390 -1.12586  
H 6.08817 0.51635 -1.31096  
C 7.39280 -0.64787 -0.05682  
H 7.05459 -0.18818 0.88669  
H 8.31186 -0.13176 -0.38806  
H 7.63600 -1.70407 0.15263  
C 6.76191 -1.19082 -2.45362  
H 7.68945 -0.71391 -2.81914  
H 5.98952 -1.08973 -3.23637  
H 6.95496 -2.26848 -2.30988

### 3<sup>DFT</sup>

SCF (BP86) Energy = -1781.21695297  
Enthalpy 0K = -1780.294216  
Enthalpy 298K = -1780.234575  
Free Energy 298K = -1780.384335  
Lowest Frequency = 21.7656 cm<sup>-1</sup>  
Second Frequency = 24.6761 cm<sup>-1</sup>  
SCF (BP86-D3BJ) Energy = -  
1781.51776029  
SCF (C6H6) Energy = -1781.22812099  
SCF (BS2) Energy = -3164.98109217

K 2.48635 -2.47855 -2.05765  
Si -1.60818 0.94506 0.79526  
Si -1.21651 -1.06006 -1.62224  
Al 1.36015 0.24793 -0.41508  
O 0.44183 -1.04921 -1.31736  
N 0.04445 1.39827 0.31035  
N -2.08970 -0.53869 -0.14450  
N 2.71310 -0.87814 0.47647  
N 4.73491 -1.81889 -0.26171  
C 0.46990 2.77632 0.47858  
C 1.17302 3.18986 1.65694  
C 1.66676 4.50696 1.75393  
H 2.21222 4.80155 2.65824  
C 1.47984 5.44025 0.73225  
H 1.87647 6.45716 0.82378  
C 0.76721 5.05266 -0.40648  
H 0.60522 5.77962 -1.21069  
C 0.25044 3.75096 -0.55398  
C 1.42580 2.25659 2.84126  
H 0.91677 1.30489 2.61839  
C 2.93274 1.96180 3.02066  
H 3.34245 1.43641 2.14180  
H 3.50811 2.89355 3.16431  
H 3.10698 1.32572 3.90782  
C 0.83370 2.82065 4.15347  
H 1.35668 3.73976 4.47253  
H -0.23480 3.07138 4.04448  
H 0.93142 2.08445 4.97100  
C -0.52404 3.44237 -1.83633  
H -1.00351 2.46168 -1.68444

C 0.40771 3.32804 -3.06500  
 H 0.96013 4.27116 -3.22601  
 H 1.14699 2.52218 -2.93974  
 H -0.17633 3.12163 -3.98045  
 C -1.63171 4.48149 -2.12649  
 H -2.28753 4.64020 -1.25564  
 H -1.20612 5.46127 -2.40692  
 H -2.25730 4.14718 -2.97355  
 C -2.81001 2.39631 0.53265  
 H -2.37226 3.31365 0.96263  
 H -3.05277 2.59469 -0.52119  
 H -3.74954 2.19113 1.07283  
 C -1.79031 0.58537 2.65360  
 H -1.03692 -0.11329 3.04642  
 H -1.68854 1.53596 3.20460  
 H -2.79348 0.18136 2.87119  
 C -3.31546 -1.21579 0.25559  
 C -4.57763 -0.85086 -0.31943  
 C -5.75378 -1.49410 0.11637  
 H -6.71160 -1.20411 -0.33020  
 C -5.72820 -2.49176 1.09318  
 H -6.65462 -2.97441 1.42258  
 C -4.49656 -2.87460 1.63002  
 H -4.46370 -3.67423 2.37867  
 C -3.28840 -2.26870 1.23085  
 C -4.72054 0.16692 -1.45372  
 H -3.73707 0.64371 -1.59617  
 C -5.75286 1.27574 -1.14851  
 H -6.77653 0.86805 -1.07533  
 H -5.53060 1.79624 -0.20422  
 H -5.75822 2.02656 -1.95832  
 C -5.10914 -0.54590 -2.77231  
 H -4.39731 -1.34660 -3.03395  
 H -6.10767 -1.01044 -2.68716  
 H -5.14514 0.17209 -3.61136  
 C -1.99936 -2.82666 1.83971  
 H -1.16999 -2.18763 1.49128  
 C -2.01157 -2.83032 3.38647  
 H -2.24835 -1.84176 3.80657  
 H -2.75444 -3.54786 3.77790  
 H -1.02531 -3.14047 3.77447  
 C -1.73620 -4.27213 1.35106  
 H -2.52582 -4.95605 1.71033  
 H -1.71776 -4.34183 0.25276  
 H -0.77138 -4.64358 1.73993  
 C -1.52056 -0.00351 -3.17637  
 H -1.32327 1.06584 -3.01211  
 H -0.83296 -0.34761 -3.97066  
 H -2.54806 -0.11032 -3.55874  
 C -1.72120 -2.83548 -2.09449  
 H -1.54111 -2.99401 -3.17314  
 H -1.13764 -3.58398 -1.53356  
 H -2.78827 -3.03358 -1.90288  
 C 2.83772 1.10111 -1.47130  
 H 2.81408 2.20209 -1.50574  
 H 2.81662 0.76984 -2.53261  
 C 4.15093 0.60818 -0.80541  
 H 4.42799 1.30248 0.01086  
 H 5.00783 0.59224 -1.50267  
 C 3.93443 -0.77434 -0.17540  
 C 2.59404 -1.96742 1.47475  
 H 3.61200 -2.14060 1.87575  
 C 1.67279 -1.52580 2.61879  
 H 0.65637 -1.30927 2.24660

H 1.58942 -2.31970 3.38138  
 H 2.05925 -0.61833 3.10565  
 C 2.12136 -3.32569 0.90412  
 H 2.90111 -3.75432 0.24987  
 H 1.96277 -4.05339 1.71923  
 H 1.16062 -3.21724 0.36787  
 C 6.09026 -1.68055 -0.80580  
 H 6.44337 -0.62718 -0.79831  
 C 6.13337 -2.17500 -2.26836  
 H 5.50402 -1.54118 -2.92172  
 H 7.15769 -2.15543 -2.67968  
 H 5.77180 -3.22041 -2.32540  
 C 7.05610 -2.50009 0.07079  
 H 6.75960 -3.56386 0.07674  
 H 8.09461 -2.42602 -0.29775  
 H 7.02890 -2.13923 1.11183

### 3

SCF (BP86) Energy = -2013.47020801  
 Enthalpy 0K = -2012.449137  
 Enthalpy 298K = -2012.382594  
 Free Energy 298K = -2012.552592  
 Lowest Frequency = 8.5305 cm<sup>-1</sup>  
 Second Frequency = 13.0081 cm<sup>-1</sup>  
 SCF (BP86-D3BJ) Energy = -  
 2013.79756845  
 SCF (C6H6) Energy = -2013.47866298  
 SCF (BS2) Energy = -3397.28884192

K -3.11376 1.50367 0.32712  
 Si 2.47025 -0.84328 -0.32017  
 Si 0.89481 1.65992 0.80689  
 Al -0.77209 -0.90984 0.19084  
 O -0.54822 0.88831 0.40750  
 N 0.97267 -1.65029 0.20419  
 N 2.23239 0.95450 -0.16052  
 N -2.14530 -0.91203 -1.21910  
 N -4.48953 -0.76694 -1.25031  
 C 1.04405 -3.02021 0.67831  
 C 0.80752 -4.11957 -0.21050  
 C 0.77319 -5.43572 0.29398  
 H 0.57802 -6.26227 -0.39946  
 C 0.98041 -5.71115 1.64718  
 H 0.94346 -6.74012 2.02098  
 C 1.24736 -4.64677 2.51359  
 H 1.42416 -4.85161 3.57587  
 C 1.29457 -3.31355 2.06241  
 C 0.58557 -3.93731 -1.71221  
 H 0.71263 -2.86465 -1.93042  
 C -0.84630 -4.34212 -2.13079  
 H -1.59815 -3.69847 -1.64461  
 H -1.06103 -5.39114 -1.85978  
 H -0.97763 -4.24944 -3.22448  
 C 1.62623 -4.72176 -2.54438  
 H 1.50049 -5.81290 -2.42708  
 H 2.65852 -4.47555 -2.24391  
 H 1.51744 -4.49051 -3.61892  
 C 1.61210 -2.23180 3.09626  
 H 1.78857 -1.30167 2.53188  
 C 0.43005 -1.98320 4.06158  
 H 0.17097 -2.90729 4.60893  
 H -0.46933 -1.64746 3.52292  
 H 0.69232 -1.21324 4.81014  
 C 2.88494 -2.54958 3.91478



|   |          |          |          |   |          |          |          |
|---|----------|----------|----------|---|----------|----------|----------|
| H | 3.74233  | -2.79232 | 3.26705  | H | -1.56532 | 1.68730  | -2.09130 |
| H | 2.72720  | -3.40570 | 4.59448  | C | -5.81142 | -1.25838 | -0.85775 |
| H | 3.16143  | -1.68442 | 4.54386  | H | -5.85752 | -1.55824 | 0.21556  |
| C | 3.96229  | -1.47322 | 0.67921  | C | -6.83688 | -0.12813 | -1.06445 |
| H | 3.94464  | -2.57655 | 0.70184  | H | -6.58866 | 0.75009  | -0.44023 |
| H | 3.99532  | -1.11070 | 1.71663  | H | -7.85701 | -0.45655 | -0.79903 |
| H | 4.89338  | -1.16564 | 0.17400  | H | -6.83577 | 0.19920  | -2.11882 |
| C | 2.97668  | -1.24215 | -2.10981 | C | -6.19289 | -2.49536 | -1.69819 |
| H | 2.16426  | -1.11633 | -2.84060 | H | -6.15489 | -2.24606 | -2.77297 |
| H | 3.31128  | -2.29270 | -2.15368 | H | -7.21073 | -2.84993 | -1.45578 |
| H | 3.82751  | -0.61044 | -2.41660 | H | -5.48715 | -3.32329 | -1.51755 |
| C | 3.25112  | 1.82042  | -0.73588 | C | -3.74038 | 3.47614  | 3.01873  |
| C | 4.37946  | 2.24297  | 0.04189  | H | -3.08406 | 3.30301  | 3.87782  |
| C | 5.37039  | 3.05226  | -0.54985 | C | -3.38404 | 4.42419  | 2.04087  |
| H | 6.22789  | 3.36654  | 0.05595  | H | -2.45065 | 4.98769  | 2.13932  |
| C | 5.28313  | 3.46775  | -1.88030 | C | -4.23517 | 4.65843  | 0.94419  |
| H | 6.06717  | 4.09159  | -2.32290 | H | -3.96477 | 5.40678  | 0.19175  |
| C | 4.16864  | 3.08605  | -2.63143 | C | -5.44327 | 3.94551  | 0.82596  |
| H | 4.07911  | 3.42710  | -3.66909 | H | -6.11280 | 4.13733  | -0.01893 |
| C | 3.14650  | 2.27965  | -2.09202 | C | -5.80014 | 2.99819  | 1.80444  |
| C | 4.54027  | 1.91996  | 1.52937  | H | -6.74633 | 2.45413  | 1.71924  |
| H | 3.74744  | 1.20335  | 1.79921  | C | -4.94836 | 2.76297  | 2.90038  |
| C | 5.90482  | 1.27802  | 1.86682  | H | -5.23231 | 2.03592  | 3.66845  |
| H | 6.73840  | 1.98093  | 1.69169  |   |          |          |          |
| H | 6.09453  | 0.37577  | 1.26514  |   |          |          |          |
| H | 5.93940  | 0.99040  | 2.93253  |   |          |          |          |
| C | 4.34898  | 3.19792  | 2.38243  |   |          |          |          |
| H | 3.38336  | 3.68947  | 2.17691  |   |          |          |          |
| H | 5.14389  | 3.93457  | 2.16872  |   |          |          |          |
| H | 4.39388  | 2.96118  | 3.46082  |   |          |          |          |
| C | 1.94488  | 1.98651  | -2.99379 |   |          |          |          |
| H | 1.29744  | 1.27583  | -2.45293 |   |          |          |          |
| C | 2.34463  | 1.36379  | -4.35206 |   |          |          |          |
| H | 2.97581  | 0.47061  | -4.23459 |   |          |          |          |
| H | 2.89952  | 2.08746  | -4.97536 |   |          |          |          |
| H | 1.44192  | 1.07333  | -4.91791 |   |          |          |          |
| C | 1.12679  | 3.27199  | -3.26824 |   |          |          |          |
| H | 1.72474  | 4.00089  | -3.84421 |   |          |          |          |
| H | 0.81029  | 3.76843  | -2.33849 |   |          |          |          |
| H | 0.22495  | 3.03715  | -3.86129 |   |          |          |          |
| C | 1.10059  | 1.54363  | 2.69680  |   |          |          |          |
| H | 1.24990  | 0.51199  | 3.04722  |   |          |          |          |
| H | 0.17459  | 1.92104  | 3.16823  |   |          |          |          |
| H | 1.93568  | 2.15919  | 3.06714  |   |          |          |          |
| C | 0.71803  | 3.51662  | 0.41654  |   |          |          |          |
| H | 0.28008  | 4.03454  | 1.28845  |   |          |          |          |
| H | 0.05464  | 3.67951  | -0.44855 |   |          |          |          |
| H | 1.68547  | 3.99496  | 0.19386  |   |          |          |          |
| C | -2.11361 | -1.74233 | 1.43066  |   |          |          |          |
| H | -1.74361 | -2.60414 | 2.00885  |   |          |          |          |
| H | -2.47435 | -1.01133 | 2.18746  |   |          |          |          |
| C | -3.29427 | -2.16918 | 0.51988  |   |          |          |          |
| H | -3.11369 | -3.19507 | 0.14546  |   |          |          |          |
| H | -4.26184 | -2.20920 | 1.05261  |   |          |          |          |
| C | -3.39081 | -1.25534 | -0.70978 |   |          |          |          |
| C | -2.13162 | -0.37546 | -2.59957 |   |          |          |          |
| H | -2.99544 | -0.82823 | -3.12439 |   |          |          |          |
| C | -0.83795 | -0.78953 | -3.31065 |   |          |          |          |
| H | 0.04741  | -0.39479 | -2.78274 |   |          |          |          |
| H | -0.81662 | -0.39697 | -4.34235 |   |          |          |          |
| H | -0.74806 | -1.88510 | -3.35674 |   |          |          |          |
| C | -2.32927 | 1.15584  | -2.68811 |   |          |          |          |
| H | -3.34980 | 1.42300  | -2.36135 |   |          |          |          |
| H | -2.23289 | 1.50000  | -3.73308 |   |          |          |          |
